1 **Limits and constraints on mechanisms of cell-cycle regulation imposed by cell size-**  
2 **homeostasis measurements**

3

4 Lisa Willis<sup>1,\*</sup>, Henrik Jönsson<sup>2,3</sup>, Kerwyn Casey Huang<sup>1,4,5,\*</sup>

5

6 <sup>1</sup>Department of Bioengineering, Stanford University, Stanford, CA 94305, USA

7 <sup>2</sup>Sainsbury Laboratory, University of Cambridge, Cambridge, CB2 1LR, UK

8 <sup>3</sup>Department of Applied Mathematics and Theoretical Physics, University of

9 Cambridge, Cambridge, CB3 0DZ, UK

10 <sup>4</sup>Department of Microbiology and Immunology, Stanford University, Stanford, CA

11 94305, USA

12 <sup>5</sup>Chan Zuckerberg Biohub, San Francisco, CA 94158, USA

13

14 \*Correspondence: [lisawillis@stanford.edu](mailto:lisawillis@stanford.edu), [kchuang@stanford.edu](mailto:kchuang@stanford.edu)

15 Lead contact: [kchuang@stanford.edu](mailto:kchuang@stanford.edu)

## 16 **Summary**

17 High-throughput imaging has led to an explosion of observations regarding cell-size  
18 homeostasis across the kingdoms of life. Among bacteria, “adder” behavior in which a  
19 constant size appears to be added during each cell cycle is ubiquitous, while various  
20 eukaryotes show other size-homeostasis behaviors. Since interactions between cell-cycle  
21 progression and growth ultimately determine size-homeostasis behaviors, we  
22 developed a general model of cell proliferation to: 1) discover how the requirement of  
23 cell-size homeostasis limits mechanisms of cell-cycle control; 2) predict how features of  
24 cell-cycle control translate into size-homeostasis measurements. Our analyses revealed  
25 plausible cell-cycle control scenarios that nevertheless fail to regulate cell size,  
26 conditions that generate apparent adder behavior without underlying adder  
27 mechanisms, cell-cycle features that play unintuitive roles in causing deviations from  
28 adder, and distinguishing predictions for extended size-homeostasis statistics according  
29 to the underlying control mechanism. The model thus provides holistic insight into the  
30 mechanistic implications of cell-size homeostasis measurements.

31

32 **Keywords:** *Cell-size homeostasis, cell growth, cell-cycle checkpoints, CDK1-cyclin activity,*

33 *Whi5, FtsZ, DnaA, inhibitor dilutor, mechanistic models, phenomenological models*

## 34 **Introduction**

35 One of the most fundamental questions in biology is how cells regulate cell-cycle  
36 progression, which is intimately tied to myriad processes such as cell-size  
37 determination (Schmoller et al., 2015), drug sensitivity (Shi et al., 2017), and  
38 transcription (Padovan-Merhard et al., 2015). In all organisms, cell-cycle control must be  
39 coupled to growth to ensure cell-size homeostasis, the maintenance of a fixed average  
40 size in steady conditions. Measurable size-homeostasis behaviors are determined by  
41 interactions between cell-cycle control and growth. Single-cell lineage tracking and cell-  
42 cycle reporters have led to a rapid proliferation in size homeostasis measurements  
43 across bacteria, yeast, mammalian cells, and plant cells. Among bacteria (Campos et al.,  
44 2014; Taheri-Araghi et al., 2015; Wallden et al., 2016; Willis and Huang, 2017) and an  
45 archaeon (Eun et al., 2018), a common theme has emerged: cells appear to regulate their  
46 size via an “adder” behavior whereby a fixed volume is added between birth and  
47 division. Among eukaryotes, budding yeast and mammalian cells can deviate from  
48 adder behavior over the G1 and S/G2 cell-cycle stages while maintaining apparent  
49 adder or near-adder behavior between birth and division (Cadart et al., 2018; Chandler-  
50 Brown et al., 2017; Di Talia et al., 2007; Schmoller et al., 2015), with the smallest  
51 mammalian cells switching to approximately “sizer” behavior with no correlation  
52 between birth and division sizes (Varsano et al., 2017). Similarly, small fission yeast  
53 exhibit sizer behavior at division while large fission yeast exhibit near-adder behaviour

54 (Facchetti et al., 2019; Fantes, 1977; Pan et al., 2014). By contrast, stem cells of *Arabidopsis*  
55 *thaliana* exhibit intermediate adder-sizer behavior (Willis et al., 2016).

56

57 Despite the recent explosion of size-homeostasis measurements, there is no clarity as to  
58 the implications of these similarities and differences for mechanisms of cell-cycle  
59 control and its coupling to growth. Furthermore, despite the centrality of these  
60 concepts, how the necessity for size homeostasis limits mechanisms of cell-cycle control  
61 is not understood. We sought to develop a theoretical framework to address two major  
62 questions: how does the requirement for cell-size homeostasis limit cell-cycle regulator  
63 dynamics and mechanisms of cell-cycle checkpoint progression, and to what extent are  
64 size-homeostasis measurements informative about underpinning mechanisms of cell-  
65 cycle regulation? Importantly, it is unresolved whether the widely observed "adder"  
66 behavior implies a common mechanism across diverse organisms.

67

68 Seminal studies have revealed how cell-cycle progression is coupled to growth in  
69 several model organisms. In budding yeast, the G1/S inhibitor Whi5 is produced  
70 throughout S/G2/M and then diluted out by growth during G1 to trigger G1/S upon  
71 reaching a threshold minimum concentration (Schmoller et al., 2015). Mathematical  
72 models showed that for budding yeast-like proliferation dynamics, this "inhibitor-  
73 dilutor" G1/S regulation imparts adder behavior between birth and division (Chandler-

74 Brown et al., 2017; Heldt et al., 2018; Soifer et al., 2016). Whi5 has functional homologs  
75 in mammals (Rb) and plants (RBR1), suggesting that an inhibitor-dilutor mechanism  
76 may regulate G1/S. In the bacterium *Escherichia coli*, the division protein FtsZ is a  
77 “master regulator” of division, with newly synthesized FtsZ accumulating at midcell  
78 proportionally with cell growth to trigger division at a total intracellular threshold level  
79 (Sekar et al., 2018; Si et al., 2019), a mechanism that recapitulates the observed adder  
80 behavior. Similarly, active DnaA, which accumulates at the origins of replication, effects  
81 adder behavior both between consecutive G1/Ss and between consecutive divisions if it  
82 is produced proportionally with growth and triggers replication initiation (G1/S) at a  
83 threshold level per origin when it is inactivated while a fixed time or added-size  
84 increment elapses between G1/S and division (Amir, 2014; Barber et al., 2017; Ho and  
85 Amir, 2015; Logsdon et al., 2017). DnaA followed by a fixed time interval and FtsZ  
86 mediated division may operate simultaneously, with the slower process triggering cell  
87 division (Micali et al., 2018a; Micali et al., 2018b; Si et al., 2019). DnaA and FtsZ are  
88 broadly conserved among bacteria but details of their dynamics and other proliferation  
89 factors are likely to vary; the extent to which size homeostasis limits their dynamics,  
90 and how they can account for the apparent universality of adder behavior across  
91 bacteria are unclear. Master regulators also control cell cycle-checkpoint progression in  
92 eukaryotes: the broadly conserved CDK1-cyclin (Harashima et al., 2013) accumulates  
93 during growth to trigger G1/S then G2/M at successive threshold activity levels in

94 engineered fission yeast (Coudreuse and Nurse, 2010). The CDK1-cyclin regulatory  
95 network is complex, but data indicate that it may result in a simple scaling relating  
96 active CDK1-cyclin accumulation to cell size (Keifenheim et al., 2017; Patterson et al.,  
97 2019).

98

99 Here, we develop a general model of cell proliferation and thus predict the size-  
100 homeostasis behaviors produced by a wide range of cell-cycle control mechanisms.  
101 Instances of the model focus on cells with two phases partitioned by the major  
102 eukaryotic cell-cycle checkpoints: G1/S and G2/M (assuming that G2/M and division are  
103 coincident), and on two rate-limiting mechanisms of irreversible checkpoint  
104 progression: master regulators like CDK1-cyclin or FtsZ/DnaA that accumulate to  
105 threshold activity levels, and Whi5-like inhibitor dilutors. Previous models have  
106 focused on particular organisms with specific cell-cycle and growth regimes, and thus  
107 do not provide a comprehensive framework connecting proliferation dynamics to size-  
108 homeostasis measurements, or do not consider the mechanism coupling growth and  
109 cell-cycle progression and therefore lack predictive power for how genetic  
110 perturbations will affect size-homeostasis behavior. We systematically identify  
111 apparently plausible cell-cycle control scenarios that nevertheless fail to regulate cell  
112 size and are thus impossible. We describe how growth, noise origins, cell cycle  
113 checkpoint criteria, and cell-cycle regulator dynamics differentially impact size

114 homeostasis measurements, and how additional size homeostasis measurements may  
115 be useful to discriminate among different underlying mechanisms that cause robust  
116 deviation from adder, as observed in *A. thaliana*. Taken together, this framework and  
117 the insights it provides should be broadly useful for interpreting and motivating cell-  
118 size homeostasis measurements across all organisms.

## 119 Results

120

### 121 A general model of cell proliferation with two cell-cycle checkpoints

122 Our models consider two types of checkpoint regulators motivated by present  
123 understanding of the eukaryotic cell cycle (Fig. 1A): 1) a master regulator (e.g., CDK1-  
124 cyclin) that accumulates from zero and triggers G1/S or G2/M progression upon  
125 reaching a total intracellular threshold level (absolute number of molecules), when it is  
126 immediately degraded; 2) an inhibitor dilutor (e.g. Whi5) that accumulates during one  
127 phase and is diluted out in the subsequent phase, triggering progression upon reaching  
128 a threshold minimum concentration with no subsequent degradation. Master regulators  
129 can accumulate through one phase, as is common for cyclins in eukaryotes, or two  
130 phases, as for CDK1-cyclin in an engineered model of fission yeast (Coudreuse and  
131 Nurse, 2010; Hochegger et al., 2008) and FtsZ/DnaA in slow-growing bacteria without  
132 multiple replication forks. Regulator production rates ( $dC/dt$ ) can be cell-size  
133 dependent and may differ between phases according to

$$134 \quad \frac{dC}{dt} = \kappa_{\text{phase}} S^{\lambda_{c,\text{phase}}}$$

135 where  $C$  is the number of proteins,  $S$  is cell size, and  $\lambda_{c,\text{phase}}, \kappa_{\text{phase}}$  are parameters (Fig.  
136 1A). Production rates change with cell size continually through the phase if  $\lambda_{c,\text{phase}} \neq 0$ .  
137 The majority of proteins are thought to be maintained at constant concentrations during  
138 steady-state growth and thus likely are produced at a fixed rate proportional to cell size



139 in exponentially growing cells ( $\lambda_{c,\text{phase}} = 1$ ) (Newman et al., 2006; Padovan-Merhard et  
140 al., 2015; Schmoller and Skotheim, 2015), while Whi5 is produced independently of size  
141 through S/G2/M in budding yeast ( $\lambda_{c,S/G2/M} = 0$ ) (Schmoller et al., 2015), and in fission  
142 yeast the activity of CDK1-cyclin may increase with a stronger size-dependence  
143 ( $\lambda_{c,\text{phase}} > 1$ ) that results from multiple regulators with cell size-dependent levels  
144 (Keifenheim et al., 2017). The ratio of regulator production rates ( $r_{S/G2/M} = \kappa_{S/G2/M}/\kappa_{G1}$ )  
145 represents two extreme scenarios: either production is gene-copy number limited,  
146 meaning that the production rate doubles in S/G2/M upon gene duplication regardless  
147 of ploidy ( $r_{S/G2/M} = 2$ ), or production is unaffected by gene-copy number ( $r_{S/G2/M} = 1$ )  
148 because another factor such as ribosome abundance is limiting (Heldt et al., 2018;  
149 Schmoller and Skotheim, 2015; Schmoller et al., 2015) (Fig. 1A). Proteins are assumed to  
150 be stable, consistent with measurements of key regulators, aside from targeted  
151 degradation (Hochegger et al., 2008; Schmoller et al., 2015). If a regulator persists  
152 through cell divisions, we assume it is inherited in proportion to daughter cell sizes  
153 without noise.

154

155 In our model, cells divide into sisters with size-ratio  $1:(\sigma - 1)$ . Thus, binary fission and  
156 asymmetric division are accounted for by  $\sigma = 2$  and  $\sigma \neq 2$ , respectively (Fig. 1B), and at  
157 steady state cells increase their average birth size by an average factor  $\sigma$  over the cell  
158 cycle. The growth rate ( $dS/dt$ ) can be cell-size dependent according to

159 
$$\frac{dS}{dt} = \gamma S^{\lambda_g}.$$

160 While many organisms grow exponentially ( $\lambda_g = 1$ ) (Di Talia et al., 2007; Osella et al.,  
161 2014; Soifer et al., 2016; Taheri-Araghi et al., 2015; Wang et al., 2010; Willis et al., 2016),  
162 there is some evidence of linear growth in certain regimes ( $\lambda_g = 0$ ) (Lin and Amir, 2018).  
163  $\gamma$  sets the average timescale for growth;  $\ln \sigma / \gamma$  is the average cell cycle duration for  
164 exponential growth (Fig. 1C).

165  
166 We consider master regulators or inhibitor dilutors of G1/S or G2/M in combination  
167 with various phenomenological controls over S/G2/M or G1, respectively, including  
168 sizer, adder, or timer control, meaning that over the phase in question cells reach a  
169 critical size, add a fixed size increment, or a fixed time period elapses. Specifically, cell  
170 size at the end of the phase ( $S_{e,phase}$ ) is determined by cell size at the beginning of the  
171 phase ( $S_{i,phase}$ ) according to

172 
$$S_{e,phase} = f_{phase} S_{i,phase} + (\sigma_{phase} - f_{phase}) \mu_{i,phase}$$

173 where  $f_{phase}$  is the mode of control ( $f_{phase} = 0, 1, \text{ or } \sigma_{phase}$  for sizer, adder, or timer  
174 control and exponential growth, respectively),  $\sigma_{phase} > 1$  is the average fold-size  
175 increase, and  $\mu_{i,phase}$  is the average initial size at steady state (Fig. 1D). We call phases  
176 that follow this size-determination rule independently regulated. The average fraction  
177 of the cell cycle spent in G1 at steady state ( $\tau$ , which equals the G1 duration  $\times \gamma / \ln \sigma$  for  
178 exponential growth) and the mode of division ( $\sigma$ ) determine  $\sigma_{G1} \approx \sigma^\tau$  and  $\sigma_{S/G2/M} \approx$

179  $\sigma^{1-\tau}$  because  $\sigma = \sigma_{G1} \sigma_{S/G2/M}$  (the approximations are exact for exponential growth,  
180 Methods). Average sizes at birth ( $\mu_{i,G1}$ ) and G1/S ( $\mu_{i,S/G2/M}$ ) are determined by a  
181 combination of parameters governing the average regulator dynamics ( $\lambda_{c,phase}, \kappa_{phase}$ )  
182 and threshold levels or concentrations, G1 duration ( $\tau$ ), growth type ( $\lambda_g, \gamma$ ), and  
183 division behavior ( $\sigma$ ) (Table S1, SI). Cell-size fluctuations emerge from noise in  
184 regulator dynamics, noise in the critical levels or concentrations that trigger cell-cycle  
185 progression, and noise in sizer/adder/timer mechanisms. The impact of noise on size-  
186 homeostasis behavior is encapsulated by two parameters ( $\eta_{G1/S}$  and  $\eta_{G2/M}$ ; Methods and  
187 SI) according to

$$188 \quad \eta_{\text{checkpoint}} = \frac{\text{Noise in the transition's checkpoint mechanism}}{\text{Coefficient of variation (CV) in G1/S size}}$$

189 (Fig. 1E). For example, assuming typical values of the CV of G1/S size of ~13% (Cadart  
190 et al., 2018; Taheri-Araghi et al., 2015; Willis et al., 2016), a typical error of ~7% in a G1/S  
191 threshold concentration checkpoint gives  $\eta_{G1/S} \sim 0.5$ , and a typical error of ~20% in a  
192 S/G2/M timer checkpoint gives  $\eta_{G2/M} \sim 0.5$  assuming exponential growth, binary fission,  
193 and  $\tau = 0.5$  (Methods and SI). Fig. 1F summarizes the parameters affecting size-  
194 homeostasis. In later sections, motivated by findings in *A. thaliana*, mammalian cells,  
195 and bacteria (Cadart et al., 2018; Ginzberg et al., 2018; Nordholt et al., 2019; Willis et al.,  
196 2016), growth and production rates are allowed to depend on cell birth size, and the  
197 threshold mechanisms for cell-cycle checkpoint progression are generalized.

198

199 Together, this model represents a broad framework for interrogating the requirements  
200 and molecular bases for cell-size homeostasis measurements.

201

202 **G1/S inhibitor dilutors combined with S/G2/M sizer or timer regulation fail to**  
203 **achieve size homeostasis in plausible cell proliferation scenarios**

204 It is well known that master regulators of G2/M produced at a constant, size-  
205 independent rate throughout both phases fail to achieve size homeostasis in  
206 exponentially growing cells: a fixed time elapses between divisions, and cells multiply  
207 their birth size by a constant factor on average prior to division, so that cells born large  
208 get larger while small cells get smaller (Willis and Huang, 2017). We applied our model  
209 to identify other cell proliferation scenarios that fail to achieve G1/S or G2/M size  
210 homeostasis. We temporarily set noise sources to zero to determine whether  
211 homeostasis is lost independently of noise. To maintain homeostasis at steady G1/S and  
212 G2/M mean sizes, G1/S and G2/M size fluctuations must regress to their respective  
213 means, which requires that the absolute value of the slope between sizes at consecutive  
214 G1/S and G2/M transitions is  $<1$  (Fig. S1). For example, the G2/M size-homeostasis  
215 requirement fails if a fixed time period  $T$  elapses between birth and division while cells  
216 grow exponentially:

217 
$$\text{G2/M size at generation } n + 1 = (\text{birth size at generation } n + 1)e^{\gamma T}$$

218 
$$= \frac{\text{G2/M size at generation } n}{\sigma} e^{\gamma T} = \text{G2/M size at generation } n$$

219 because at steady state  $e^{yT} = \sigma$ ; hence the slope between consecutive G2/M sizes is 1  
220 and fluctuations do not decay to the mean. The loss of size homeostasis occurs despite  
221 the fixed cell cycle duration. Below, we readily identify more complex conditions that  
222 fail to regulate size by analytically deriving these slopes in terms of model parameters  
223 (Methods, SI).

224

225 In exponentially growing budding yeast, Whi5 executes inhibitor-dilutor control of  
226 G1/S, with Whi5 produced at a constant rate through S/G2/M, and an approximately  
227 fixed interval elapses between G1/S and G2/M (Schmoller et al., 2015). If S/G2/M is  
228 under timer control and growth is exponential, our model predicts that an inhibitor  
229 produced in proportion to cell size or growth ( $\lambda_{c,S/G2/M} = \lambda_g = 1$ ; Fig. 1A,C) or with a  
230 stronger size-dependency ( $\lambda_{c,S/G2/M} \geq 1$ ) fails to regulate both G1/S and G2/M sizes (Fig.  
231 2Ai,ii, Table S2). Single-cell trajectories with realistic noise levels illustrate this loss of  
232 size control as  $\lambda_{c,S/G2/M}$  varies from 0 (constant production rate) to 1 (proportional to  
233 size) (Fig. 2Bi-iv) while the G1 and S/G2/M durations and thus the ordering of G1/S and  
234 G2/M are maintained so cells contain the correct number of genome copies. By contrast,  
235 if S/G2/M were under adder control, size homeostasis is achieved for  $\lambda_{c,S/G2/M} = 0$  and 1  
236 (Fig. 2Aiii,iv).

237

238 Regardless of the type of growth and inhibitor production, the inhibitor threshold  
239 concentration for G1/S, and the division pattern, we also found that G1/S inhibitor  
240 dilutors are incompatible with G2/M sizer mechanisms and long G1 durations ( $\tau \geq 0.5$ ):  
241 for  $\tau \approx 0.5$ , fluctuations below the average G1/S size are overcompensated for in the  
242 subsequent generation (Fig. 2Av,vi), consistent with analytical predictions of a slope  
243 between consecutive G1/S sizes  $\leq -1$  (Fig. S1, Table S2), so G1/S size homeostasis is lost  
244 and transitions frequently alternate between the beginning and end of the cell cycle  
245 (arrows in Fig. 2Bv,vi). Analogous results apply for inhibitor dilutors that trigger G2/M  
246 rather than G1/S with timer/adder/sizer control over G1 (SI). The model's generality and  
247 analytical tractability enabled these results, which demonstrate how cell proliferation  
248 scenarios that are *a priori* biologically plausible necessarily fail to achieve size  
249 homeostasis and thus can be ruled out.

250

251 **Master regulators can lose cell-size control when production is gene copy-number**  
252 **limited or strongly size-dependent, or when a threshold concentration triggers phase**  
253 **progression**

254 CDK1-cyclin and DnaA/FtsZ cell-cycle regulation are thought to be widely conserved in  
255 eukaryotes and bacteria, respectively, but details of the regulators' dynamics and other  
256 proliferation factors have yet to be quantified in nearly all species. Motivated by CDK1-  
257 cyclin and DnaA/FtsZ, we focused on G2/M and G1/S master regulators produced

258 through both phases (“two-phase” master regulators) and applied our model to identify  
259 limits on proliferation dynamics imposed by size homeostasis.

260

261 For exponentially growing cells, when regulator production is gene copy-number  
262 limited ( $r_{S/G2/M} = 2$ ; Fig. 1A), G2/M two-phase master regulators produced at a size-  
263 independent rate ( $\lambda_{c,G1/S} = \lambda_{c,S/G2/M} = 0$ ) fail to execute size homeostasis for G1 timer  
264 control, because then a fixed time elapses over the cell cycle which is incompatible with  
265 exponential growth regardless of other parameters (Fig. 3Ai). However, we found that  
266 size homeostasis is restored for G1 sizer or adder control (Fig. 3Aii,iii, Table S2) largely  
267 regardless of the average G1 duration ( $\tau$ ). By contrast, G1/S two-phase master  
268 regulators that are gene copy-number limited are incompatible with G2/M sizer  
269 regulation: this combination fails to implement G1/S size homeostasis for binary fission  
270 or asymmetric division ( $\sigma \leq 2$ ) (Fig. 3B, Table S2). This finding depends on the  
271 increased rate of regulator production during S/G2/M due to gene-copy number  
272 doubling and, conditional upon no growth rate ( $\gamma$ ) increase during S/G2/M, holds  
273 regardless of the average G1 duration and the size-dependencies of production and  
274 growth ( $\lambda_g$  and  $\lambda_{c,phase}$ , assuming  $\lambda_{c,G1} = \lambda_{c,S/G2/M}$ ) (SI). Here, the loss of G1/S size  
275 homeostasis while G2/M size homeostasis is enforced implies that the proper ordering  
276 of G1/S followed by G2/M is also lost (Fig. S2). G1/S two-phase master regulators  
277 produced at a strongly size-dependent rate throughout the cell cycle without being

278 gene copy-number limited ( $\lambda_c = \lambda_{c,G1} = \lambda_{c,S/G2/M} \geq 2 + \lambda_g, r_{S/G2/M} = 1$ ) fail to execute  
279 G1/S size homeostasis for S/G2/M timer regulation combined with binary fission or  
280 asymmetric division ( $\sigma \geq 2$ ) and long S/G2/M durations ( $1 - \tau \geq 0.6$ ) (Fig. 3Ci, iv). For  
281  $\lambda_c = 2 + \lambda_g$  but not  $\lambda_c = 3 + \lambda_g$ , size homeostasis is restored by S/G2/M adder or sizer  
282 regulation (Fig. 3C, Table S2). Thus, under exponential growth, G1/S two-phase master  
283 regulators such as DnaA robustly achieve size homeostasis only when  $0 < \lambda_c < 3$ .

284

285 While size homeostasis is achieved by two-phase master regulators produced from an  
286 initial level of zero in proportion to growth ( $\lambda_{c,G1} = \lambda_{c,S/G2/M} = \lambda_g, r_{S/G2/M} = 1$ ) to trigger  
287 phase progression at a threshold level (Amir, 2014), we found that if instead  
288 progression is triggered at a critical concentration (or a local threshold density in an  
289 intracellular region that scales proportionally with cell size), size homeostasis is  
290 generally lost (Fig. 3D, SI). This mechanism fails because a threshold concentration  
291 means that cell size at the checkpoint is proportional to the regulator's level, which is  
292 proportional to the added size since production is proportional to growth. Thus, cell  
293 size at the checkpoint is proportional to the added size, and ultimately cells multiply  
294 their birth size by a constant factor on average prior to division, so there is no negative  
295 feedback on size fluctuations. However, if the size-dependence of regulator production  
296 exceeds that of growth ( $\lambda_{c,phase} > \lambda_g$ ), size homeostasis can be restored (SI). Thus, to



297 maintain size homeostasis in bacteria, the division-initiating FtsZ midcell bands must  
298 not increase in width proportionally as the cell grows.

299

300 In all cases above, analytical predictions were confirmed by simulations of single-cell  
301 trajectories with realistic size fluctuations (Fig. 2B, 3D, S2). A recurring theme is that  
302 switching to adder regulation of S/G2/M or G1 restored size homeostasis when sizer or  
303 timer regulation failed (white regions in Fig. 2A, 3A,B,C). Thus, these scenarios  
304 illustrate robustness of adder regulation, regardless of its molecular origin.

305

### 306 **Connecting cell-cycle regulation mechanisms to linear regression slopes between** 307 **birth and division sizes**

308 When taking noise into account, we can predict how regulatory factors affect size-  
309 homeostasis behaviors at steady state by deriving linear regression slopes between birth  
310 and division sizes and among other size variables (Methods). We present particular  
311 scenarios motivated by experiment (see SI for the general case).

312

313 At least in *E. coli*, DnaA appears to operate as a two-phase master regulator between  
314 consecutive G1/Ss (Si et al., 2019), while in slow growth conditions S/G2/M is  
315 independently regulated by a timer or adder mechanism or a mechanism whereby both  
316 a minimum time period elapses and a minimum size increment is added between

317 divisions (Logsdon et al., 2017; Micali et al., 2018b). Then, the linear regression slope of  
 318 birth vs. division size is

$$319 \quad (1) \quad \left( \sigma_{G1}^{\lambda_g - \lambda_c} - r_{S/G2/M} \sigma_{S/G2/M}^{\lambda_c - \lambda_g} \right) f_{S/G2/M} + r_{S/G2/M} \frac{\left( \frac{f_{S/G2/M}}{\sigma_{S/G2/M}} \right)^2}{\left( \frac{f_{S/G2/M}}{\sigma_{S/G2/M}} \right)^2 + \eta_{G2/M}^2}$$

320 where  $\lambda_c = \lambda_{c,G1} = \lambda_{c,S/G2/M}$  represents the regulator's size-dependent production,  
 321 which we assume to be constant throughout the cell cycle, and recalling  $\sigma_{G1} \approx \sigma^\tau \approx$   
 322  $\sigma / \sigma_{S/G2/M}$  (Fig. 1F, Methods). From Eq. 1, and in agreement with other studies (Amir,  
 323 2014; Ho and Amir, 2015), a production rate that is proportional to growth ( $\lambda_c = \lambda_g$ ,  
 324  $r_{S/G2/M} = 1$ ) combined with low G2/M checkpoint noise vs. other sources of cell size  
 325 noise ( $\eta_{G2/M} \ll 1$ ) and supra-sizer control of G2/M ( $f_{S/G2/M} > 0$ ) gives a slope  $\sim 1$ , which  
 326 means that apparent adder behavior (slope=1) is predicted regardless of further  
 327 constraints on the S/G2/M control mechanism ( $f_{S/G2/M}$ ) (Fig. 4A).  $\eta_{G2/M}$  is small when cell  
 328 size fluctuations are primarily from noise sources other than the G2/M checkpoint, for  
 329 example, from fluctuations in regulator production (Fig. 1E). Under exponential  
 330 noiseless growth, a typical error  $e_{G2/M}$  in a S/G2/M timer checkpoint (CV of S/G2/M  
 331 duration, SI) dictates that  $\eta_{G2/M} = e_{G2/M} \ln \sigma_{S/G2/M} / (\text{CV of G1/S size})$ , so for  $e_{G2/M} = 10\%$ ,  
 332  $\sigma_{S/G2/M} \approx \sigma^{1-\tau} \approx 1.4$ , and a CV of G1/S size = 13%, then  $\eta_{G2/M}^2 \approx 0.06$  has a nominal  
 333 effect on the slope in Eq. 1 (Fig. 4A).

334

335 In engineered fission yeast, CDK1-cyclin is produced through G1 and S/G2/M to trigger  
336 G2/M at a threshold prior to degradation (Coudreuse and Nurse, 2010), while in *E. coli*  
337 FtsZ accumulates at midcell up to a threshold level to trigger G2/M or division (Si et al.,  
338 2019); in both cases, G2/M is likely controlled by a two-phase master regulator. The  
339 corresponding linear regression slope of birth vs. division size is

$$340 \quad (2) \quad \sigma^{\lambda_g - \lambda_c} r_{S/G2/M}^{-1} + \sigma_{S/G2/M}^{\lambda_g - \lambda_c} (1 - r_{S/G2/M}^{-1}) f_{G1},$$

341 producing adder behavior when production and growth rates are proportional  
342 throughout the cell cycle ( $\lambda_c = \lambda_g$ ;  $r_{S/G2/M} = 1$ ) regardless of other parameters. For  
343 strongly size-dependent production ( $\lambda_c > \lambda_g$ ), from Eq. 2, G2/M master regulators  
344 asymptote to slopes of  $\sim 0$  and thus to apparent sizer behaviors regardless of other  
345 parameters (Fig. 4B). By contrast, from Eq. 1, for  $\lambda_c \approx \lambda_g + 2$ , G1/S two-phase master  
346 regulators tend to produce strongly negative slopes corresponding to oscillatory size  
347 behaviors where the average is overshoot then undershot (Fig. 4C).

348

349 Eq. 1 indicates that high G2/M checkpoint noise ( $\eta_{G2/M}^2 \sim 1$ ) invariably reduces the slope  
350 of G1/S two-phase master regulators, an effect that can be understood qualitatively.

351 High  $\eta_{G2/M}$  and a non-noisy coupling between growth and regulator dynamics entail  
352 that cells born small contain less master regulator and therefore must produce more  
353 regulator over G1 and correspondingly grow more to achieve the threshold level for  
354 G1/S (Fig. 4D). For timer/adder/intermediate sizer-adder regulation of S/G2/M, any

355 compensatory growth over G1 is inherited as a positive fluctuation in G2/M-added size.  
356 Thus, the slope between birth and division is reduced by noisy G2/M checkpoint  
357 control, and this effect can be masked by other processes that contribute to G1/S size  
358 fluctuations without coupling G1/S size to birth size, such as noisy production of the  
359 G1/S regulator. By contrast, the slope in Eq. 2 is unaffected by noise levels (SI): noise  
360 impacts the size-homeostasis behaviors between birth and division of G1/S regulators  
361 because the production and persistence of the regulator through G2, mitosis, and  
362 division correlates birth-size fluctuations with fluctuations in birth-regulator levels;  
363 G2/M regulators are degraded or used up prior to birth, so there is no mechanism to  
364 generate such a correlation.

365

366 These findings showcase the interplay of factors contributing to size-homeostasis  
367 statistics and opposing predictions for G1/S vs. G2/M two-phase master regulators  
368 concerning the effects of noise and size-dependent production.

369

370 **Noise levels dictate whether inhibitor dilutors achieve adder-like, sizer-like, or**  
371 **supra-adder behaviors**

372 In budding yeast, various studies have identified adder-like behavior between birth and  
373 division (Chandler-Brown et al., 2017; Di Talia et al., 2007; Soifer et al., 2016). However,  
374 deletion of *CLN3*, which leads to prolonged G1 and increased average size (Cross, 1988),

375 or an additional copy of *WHI5* caused behavior closer to sizer for cells that were born  
376 small (Chandler-Brown et al., 2017). Experiment and theory have shown that in the  
377 absence of noise, the observed combination of constant production of the inhibitor  
378 dilutor *WHI5* controlling G1/S, exponential cell growth, and timer control of S/G2/M can  
379 result in apparent adder behavior (Chandler-Brown et al., 2017; Di Talia et al., 2007;  
380 Heldt et al., 2018; Schmoller et al., 2015; Soifer et al., 2016), despite the lack of a  
381 molecular adder underpinning the phenomenological behavior between birth and  
382 division. Moreover, noise was suggested to have the potential to disrupt adder behavior  
383 (Barber et al., 2017).

384

385 We applied our model to determine how noise and gene copy-number effects impact  
386 size-homeostasis behaviors of budding yeast-like G1/S inhibitor dilutors. The linear  
387 regression slope of G1/S size vs. overall added size until the next G1/S (ignoring the  
388 intervening division) most easily discerns the size-homeostasis behavior between  
389 consecutive G1/Ss: a slope of 0 indicates adder behavior. For exponential growth,  
390 S/G2/M timer control, and constant inhibitor production through S/G2/M as in budding  
391 yeast, the linear regression slope of G1/S size vs. overall added size until the next G1/S  
392 is

393 
$$(3) \quad - \eta_{G1/S}^2,$$

394 and the slope of birth vs. division size is

395

$$(4) \quad 1 + \left( \frac{\sigma - 1}{\ln \sigma_{S/G2/M}} - 1 \right) \eta_{G2/M}^2 - \eta_{G1/S}^2$$

396 (Methods). From Eqs. 3 and 4, noise contributions affect size-homeostasis behaviors  
397 (Fig. 4E-G) while the inhibitor's production rate ( $\kappa_{S/G2/M}$ ) and threshold concentration  
398 for G1/S, which are feasibly altered by *WHI5* and *CLN3* copy numbers, have no impact.  
399 Apparent adder behaviors, corresponding to slopes of  $\sim 0$  and  $\sim 1$  in Eqs. 3 and 4,  
400 respectively, are observed only for relatively stringent G1/S checkpoint control: for a  
401 typical error in the inhibitor's G1/S threshold concentration of  $e_{G1/S} = 10\%$ ,  $\eta_{G1/S} =$   
402  $e_{G1/S}/CV(G1/S \text{ size}) \approx 0.8$  (assuming  $CV(G1/S \text{ size}) \approx 13\%$ ), so the slopes in Eqs. 3 and 4  
403 are perturbed by  $-0.8^2 = -0.64$  producing sub-adder behaviors (Fig. 4E,G); whereas for  
404 a comparable typical error in the S/G2/M timer checkpoint of  $e_{G2/M} = 10\%$ , then  $\eta_{G2/M} =$   
405  $e_{G2/M} \ln \sigma_{S/G2/M} / CV(G1/S \text{ size}) = 0.25$  (assuming  $\sigma = 2$  and  $\sigma_{S/G2/M} = \sigma^{1-\tau} = 2^{0.5} = 1.4$ )  
406 and the slope in Eq. 4 is perturbed considerably less (by only  $+0.12$ , Fig. 4F) and near-  
407 adder behavior results. Among inhibitor dilutors, similar to G1/S two-phase master  
408 regulators (Eq. 1), adder behaviors require that size fluctuations are primarily from  
409 noise sources other than cell-cycle checkpoint mechanisms, such as fluctuations in  
410 inhibitor production and dilution.

411

412 The size-homeostasis behaviors in Eqs. 3 and 4 can be understood qualitatively. The key  
413 feature that results in apparent adder behavior between G1/Ss is the constant amount of

414 inhibitor produced over S/G2/M: the critical concentration at G1/S means that every  
415 inhibitor molecule corresponds to a small unit size  $s_0$ , so if  $n$  inhibitor molecules are  
416 produced over S/G2/M, the cell adds a size  $n \times s_0$  to achieve the threshold concentration  
417 at the next G1/S (Fig. 4H) (Schmoller et al., 2015). Noise in either the inhibitor dynamics  
418 or the S/G2/M timer phase alters the number of inhibitor molecules produced during  
419 S/G2/M, and therefore causes the added size between consecutive G1/Ss to fluctuate,  
420 but this fluctuation is independent of the initial G1/S size. By contrast, fluctuations in  
421 the threshold concentration (the G1/S checkpoint) entail the opposite scenario; a high  
422 inhibitor threshold concentration corresponds to small cells at G1/S, so small cells must  
423 grow more than the average to dilute out the surplus inhibitor, leading to sub-adder  
424 behavior between G1/Ss. If G1/S size fluctuations arise entirely from G1/S checkpoint  
425 noise, then the relatively small noise in inhibitor production and S/G2/M interval means  
426 that daughter cells inherit a constant amount of inhibitor at birth, and the threshold  
427 concentration necessary for G1/S translates into a threshold cell size, resulting in  
428 apparent sizer regulation. These arguments apply to any inhibitor production rate and  
429 S/G2/M regulatory mode that together produce a constant amount of inhibitor during  
430 S/G2/M regardless of growth pattern and G1 duration, under the assumption of no  
431 inhibitor degradation following G1/S. Rapid inhibitor degradation following G1/S  
432 would produce sizer behavior between G1/Ss, since regardless of noise levels, the G1  
433 regulator level would be uncoupled from the preceding G1/S size.

434

435 These findings indicate that G1/S inhibitor dilutors can exhibit adder, supra-adder, or  
436 sizer behavior depending on which processes make the primary contributions to cell-  
437 size fluctuations (Schmoller et al., 2015). Stringent control of the inhibitor's threshold  
438 concentration for G1/S is necessary for apparent adder behavior, and noise in this  
439 control may lead to sizer-like behaviors.

440

#### 441 **Deviations in regulator localization patterns cause supra-adder behaviors**

442 Cell-cycle regulators can accumulate in a particular region of the cell, triggering  
443 checkpoint progression at a local threshold density. For example, in fission yeast the cell  
444 cycle regulator *cdr2* accumulates at midcell to trigger division at a local threshold  
445 density (Facchetti et al., 2019; Pan et al., 2014). In this case, the threshold density  
446 mechanism effects a total intracellular threshold level criterion, because fission yeast  
447 grow as rods and the *cdr2* localization region at midcell does not scale with size.  
448 Division in rod-shaped *E. coli* is regulated in an analogous way by FtsZ (Shi et al., 2017;  
449 Si et al., 2019). By contrast, the midcell diameters of coccoid bacteria and plant stem  
450 cells are not constant but increase with cell size (Willis et al., 2016), and in general  
451 cellular geometries and growth patterns vary among organisms.

452



453 To address the implications of heterogeneous localization, we derived the size-  
 454 homeostasis behaviors of G2/M two-phase master regulators that accumulate to a  
 455 threshold density within a cellular region that increases with cell size as  $\sim S^{\lambda_T}$ . The  
 456 region grows in proportion to size if  $\lambda_T = 1$  (as do most nuclei), and (depending on  
 457 geometry) with surface area or midcell perimeter if  $\lambda_T \approx 2/3$  or  $1/3$ . Then, assuming  
 458  $\lambda_c = \lambda_{c,G1} = \lambda_{c,S/G2/M}$  and  $r_{S/G2/M} = 1$  (Fig. 1F), the linear regression slope of birth vs.  
 459 division size is

$$460 \quad (5) \quad \frac{\sigma^{\lambda_g - \lambda_c}}{1 - \lambda_T \frac{\sigma^{\lambda_g - \lambda_c - 1} - 1}{\lambda_g - \lambda_c - 1}} = \frac{1}{1 - \lambda_T (1 - \sigma^{-1})} \text{ for } \lambda_g = \lambda_c$$

461 (SI). From Eq. 5, because  $\frac{\sigma^{\lambda_g - \lambda_c - 1} - 1}{\lambda_g - \lambda_c - 1} > 0$ , localization to a region that increases with size  
 462 ( $\lambda_T > 0$ ) invariably increases the slope (Fig. 5A), predicting supra-adder behavior when  
 463 growth and regulator production are proportional ( $\lambda_g = \lambda_c$ ) and intermediate sizer-  
 464 adder behavior when production is strongly size-dependent ( $\lambda_c \gg 1$ ). Adder behavior is  
 465 achieved when a threshold concentration rather than level of regulator triggers G2/M  
 466 ( $\lambda_T = 1$  vs.  $\lambda_T = 0$  in Eq. 5) under the requirements that  $\lambda_g < \lambda_c$  and  $\lambda_g - \lambda_c =$   
 467  $\frac{1 - \sigma^{-1}}{1 - \sigma^{-(\lambda_g - \lambda_c)}} (\approx -0.7 \text{ for } \sigma = 2)$  (Fig. 5B). We have been unable to identify plausible  
 468 mechanisms producing this relation, suggesting that threshold concentration  
 469 mechanisms are unlikely to underlie adder behavior.

470

471 Cell cycle inhibitors can also localize to subcellular regions, such as the localization of  
472 Whi5 to the nucleus for part of G1 in budding yeast (Di Talia et al., 2007). If an inhibitor  
473 dilutor localizes to a region that increases with cell size as  $\sim S^{\lambda_T}$  and triggers G1/S upon  
474 reaching a threshold density within that region, the linear regression slope of birth vs.  
475 division size is

$$476 \quad (6) \quad \sigma^{1-\lambda_T} \left( 1 + \left( \frac{\sigma^{\lambda_T} - 1}{\lambda_T \ln \sigma_{S/G2/M}} - 1 \right) \eta_{G2/M}^2 - \eta_{G1/S}^2 \right).$$

477 From Eq. 6, for stringent checkpoint control or noisy inhibitor dynamics ( $\eta_{G1/S}^2$  and  
478  $\eta_{G2/M}^2 \ll 1$ ), localization to any region that does not scale proportionally with size ( $\lambda_T <$   
479 1) increases the slope (Fig. 5C), again predicting supra-adder behavior (SI).

480

481 In summary, deviations in regulator localization patterns from the default scenarios  
482 (localization to a region that is proportional to size in inhibitor dilutors or independent  
483 of size in master regulators) increases the linear regression slope between birth and  
484 division sizes, tending to generate supra-adder behavior.

485

486 **Apparent adder regulation between birth and division can be achieved with non-**  
487 **adder regulation over G1 and S/G2/M via independently regulated G1 or S/G2/M**  
488 **phases**

489 Mammalian cells and budding yeast behave as apparent adders or near-adders between  
490 birth and division. However, the linear regression slopes between birth and G1/S sizes

491  $(l_{G1})$ , and G1/S and G2/M or division sizes ( $l_{S/G2/M}$ ), are significantly different from 1  
492 (Cadart et al., 2018; Chandler-Brown et al., 2017; Schmoller et al., 2015), indicating  
493 deviations from adder behavior over G1 and S/G2/M individually. In some strains, the  
494 G1 size-homeostasis behavior is sub-adder, compensating for a supra-adder timer mode  
495 of S/G2/M regulation to achieve an overall adder between birth and division (Cadart et  
496 al., 2018).

497  
498 To consider how cell proliferation mechanisms can give rise to G1 compensatory  
499 behaviors, it was important to establish the consequences of independent regulation of  
500 a phase (Fig. 1D). Eukaryotic cyclin-like regulators that are produced through only one  
501 phase and degraded outside of this phase are likely to produce independently regulated  
502 phases, because only size fluctuations at the beginning of the phase impact the  
503 regulator's dynamics and thus size fluctuations at the end of the phase (Fig. 6A). For  
504 independently regulated phases with control mode  $f_{\text{phase}}$ , the linear regression slope  
505 between cell sizes at the beginning and end of the phase is  $l_{\text{phase}} = f_{\text{phase}}$  (Methods). If  
506 S/G2/M is independently regulated, the steady state linear regression slope of birth vs.  
507 division size is

$$508 \quad (7) \quad l_{G1} l_{S/G2/M}$$

509 (SI). From Eq. 7, any mechanism that achieves apparent adder behavior between birth  
510 and division must exhibit a G1 behavior that compensates for the S/G2/M regulation,

511 that is,  $l_{G1} = 1/l_{S/G2/M}$ , which causes a negative correlation between birth size and G1  
512 duration (Fig. 6B, SI). Failure to satisfy Eq. 7, signifying deviation from G1  
513 compensatory behavior, implies that S/G2/M is not independently regulated, likely  
514 because progression through S/G2/M is limited by molecular species that persist  
515 through multiple cell-cycle phases. Otherwise, if the independently regulated S/G2/M  
516 phase is noisy, the contribution of G2/M checkpoint noise to cell size fluctuations may  
517 alter the apparent size-homeostasis behavior between birth and G1/S ( $l_{G1}$ ), because  
518  $\eta_{G2/M}$  can affect linear regression slopes between birth and division (e.g.  $\eta_{G2/M} >$   
519  $f_{\text{phase}}/\sigma_{\text{phase}}$  in Eqs. 1 and 4) without affecting the mode of independently regulated  
520 S/G2/M control ( $f_{S/G2/M} = l_{S/G2/M}$ ). By contrast, a stringently regulated independent  
521 phase ( $\eta_{\text{checkpoint}} \ll f_{\text{phase}}/\sigma_{\text{phase}}$ ) displays the same size-homeostasis behaviors  
522 between consecutive G2/Ms and consecutive G1/Ss at steady state (Fig. 6C, SI),  
523 regardless of other modeling assumptions. Then, Eq. 7 holds regardless of whether G1  
524 or S/G2/M is the independently regulated phase, and any scenario that produces adder  
525 behavior over the cell cycle, between either birth and division or G1/Ss, produces the  
526 apparent G1 vs. S/G2/M compensatory behavior.

527

528

529 Size homeostasis measurements in the *A. thaliana* apical stem cell niche, an expanse of  
530 tissue at the plant apex that gives rise to all above-ground organs, established a linear

531 regression slope of birth vs. division size  $\approx 0.5$  (Willis et al., 2016) (Fig. 7A). No  
532 mechanistic model has previously been proposed to explain this intermediate behavior  
533 between sizer and adder. CDK1-cyclin species are highly conserved as major G1/S and  
534 G2/M regulators throughout eukaryotes, including *A. thaliana* (Scofield et al., 2014).  
535 Whi5 has no structural *A. thaliana* homolog, but the *A. thaliana* human retinoblastoma  
536 (RBR1) homolog plays a functional role similar to Whi5 (Harashima and Sugimoto,  
537 2016; Turner et al., 2012), raising the possibility that *A. thaliana* G1/S is regulated by an  
538 inhibitor dilutor.

539

540 Since our model can generate homeostasis behaviors that vary continuously depending  
541 on factors such as regulator dynamics and noise levels, we applied Eqs. 1-7 to identify  
542 control mechanisms that could account for intermediate sizer-adder behavior. Here, we  
543 highlight five mechanisms taking into account that *A. thaliana* stem cells increase their  
544 average size by 1.5-fold over G1 ( $\sigma_{G1} = 1.5$ ) (Dewitte et al., 2003) and by 2-fold over the  
545 cell cycle ( $\sigma = 2$ ), implying a 1.3-fold increase over S/G2/M ( $\sigma_{S/G2/M} = \frac{\sigma}{\sigma_{G1}} = 1.3$ ), and  
546 grow exponentially throughout the cell cycle ( $\lambda_g = 1$ ) at a per unit size rate that  
547 correlates negatively with birth size (Willis et al., 2016). To account for the negative  
548 correlation, we model growth rate dependence on birth size fluctuations as  
549  $\gamma(1 + \alpha_g \Delta S_{i,G1})$  and regulator production rate dependence on initial size fluctuations as  
550  $\kappa_{\text{phase}}(1 + \alpha_{c,\text{phase}} \Delta S_{i,\text{phase}})$ , where  $\Delta S_{i,\text{phase}} = \frac{S_i}{\mu_{i,\text{phase}}} - 1$  is the scaled deviation from the

551 average size at the beginning of the phase ( $\mu_{i,\text{phase}}$ ) (SI). In *A. thaliana* stem cells,  $\alpha_g \approx$   
552  $-0.5$  (Willis et al., 2016) while  $\alpha_{c,\text{phase}}$  is unknown. This negative correlation is not  
553 unique to plants; it has recently been observed in mammalian and bacterial cell lines  
554 (Cadart et al., 2018; Nordholt et al., 2019). The hypothesized mechanisms are described  
555 below, with distinguishing predictions for other measurable statistics: the linear  
556 regression slopes between birth and G1/S sizes ( $l_{G1}$ ), between G1/S and G2/M sizes  
557 ( $l_{S/G2/M}$ ), and the relative CVs in G2/M size vs. G1/S size ( $\rho_{G2/M \text{ vs. } G1/S}$ ) (Fig. 7B).

558  
559 (1) A G2/M two-phase master regulator produced in proportion to cell size with no  
560 gene-copy number or birth-size dependence ( $\lambda_{c,\text{phase}} = 1, r_{S/G2/M} = 1, \alpha_{c,\text{phase}} = 0$ )  
561 generates a linear regression slope of birth vs. division size of

$$562 \quad (8) \quad 1 + \alpha_g (\sigma - 1)$$

563 regardless of the mode of G1/S regulation and noise levels, producing intermediate  
564 sizer-adder behavior for *A. thaliana* stem cells where  $\alpha_g = -0.5, \sigma = 2$ . If  $\rho_{G2/M \text{ vs. } G1/S} \approx$   
565  $1$ , as is the case for mammalian cells (Cadart, 2018), apparent near-sizer behavior  
566 between G1/S and G2/M ( $l_{S/G2/M} \approx 0$ ) is a key prediction (Fig. 7C, SI).

567  
568 (2) A G1/S two-phase master regulator produced in proportion to growth with no gene-  
569 copy number effect on regulator production ( $\lambda_c = 1, r_{S/G2/M} = 1$  in Eq. 1,  $\alpha_{c,\text{phase}} = -0.5$   
570 (SI)) with a noisy, independently regulated S/G2/M such that  $\eta_{G2/M} \approx f_{S/G2/M}/\sigma_{S/G2/M}$ .

571 Key predictions are supra-sizer S/G2/M control  $f_{S/G2/M} = l_{S/G2/M} > 0$ ,  $l_{G1} \approx 0.5/l_{S/G2/M}$

572 and  $\rho_{G2/M \text{ vs. } G1/S} \approx 1.4 \frac{l_{S/G2/M}}{\sigma_{S/G2/M}}$  (Fig. 7D).

573

574 (3) A G2/M two-phase master regulator produced with the same size dependence as

575 growth ( $\lambda_c = 1$  in Eq. 2,  $\alpha_{c,\text{phase}} = -0.5$ , SI), but, unlike growth, the regulator's

576 production rate is gene copy-number limited and doubles during S/G2/M ( $r_{S/G2/M} = 2$ ).

577 Key predictions are  $l_{G1} \approx 0$  and  $l_{S/G2/M} \approx 0.5$  (Fig. S3A).

578

579 (4) A G2/M two-phase master regulator produced in proportion to the square of cell size

580 throughout the cell cycle ( $\lambda_c = 2$  in Eq. 2) with the same birth-size dependence as

581 growth and no gene copy-number effect ( $\alpha_{c,\text{phase}} = -0.5$ ,  $r_{S/G2/M} = 1$ ). Predictions are

582 similar to those of mechanism (1) (Fig. 7C vs. S3B), so it is necessary to measure

583 regulator dynamics to distinguish between mechanisms (1) and (4).

584

585 (5) A budding yeast-like G1/S inhibitor dilutor produced at a constant birth-size

586 independent rate through S/G2/M while S/G2/M exhibits timer regulation and a noisy

587 G1/S threshold concentration ( $\eta_{G1/S} \approx 0.7$  in Eq. 4). Predictions are  $l_{G1} \approx 0.4$ ,  $l_{S/G2/M} \approx$

588 1.2, and  $\rho_{G2/M \text{ vs. } G1/S} \approx 1$  (Fig. S3C).

589

## 590 **Discussion**

591 Here, we developed a general, mechanistic model of cell proliferation with two cell  
592 cycle phases, aiming to achieve a pragmatic tradeoff between the representation of cell  
593 cycle complexity and model analyzability (Fig. 1). We applied the model to determine  
594 how size homeostasis is broken without necessarily disrupting the proper ordering of  
595 G1/S and G2/M or division by changing mechanisms of cell-cycle regulation (Fig. 2,3).  
596 For example, size homeostasis would break: (1) if the width of FtsZ bands were to  
597 increase proportionally with growth to trigger division at a local threshold density; (2)  
598 in slow-growing bacteria without multiple replication forks, if DnaA activity were to  
599 scale independently of or strongly with cell size while S/G2/M were under timer  
600 control; (3) in budding yeast, if Whi5 was produced in proportion to cell size rather than  
601 at a constant rate; (4) in many cases, with gene-copy number effects on regulator  
602 production. These findings reveal unintuitive constraints on cell-cycle regulation  
603 imposed by size homeostasis requirements. They explain why certain patterns of cell  
604 cycle regulation have been observed and not others, and suggest a breadth of cellular  
605 designs for the loss of size homeostasis, potentially enabling experimentalists to probe  
606 the physiological implications of a transient loss of size control.

607

608 General analytical expressions connect cell cycle control mechanisms to measured size  
609 homeostasis statistics (Eqs. 1-8, Methods, SI), thus providing a linchpin that ultimately



610 connects genotype to size-homeostasis phenotype. In some cases, unintuitive  
611 implications were revealed, such as the potential enhancement of adder behavior by  
612 noisy regulator production (Fig. 4), potential deviations from adder by regulator  
613 localization patterns (Fig. 5), and the curious statistical signatures of independently  
614 regulated phases (Fig. 6). We have inevitably approximated or omitted certain details of  
615 cell proliferation, yet the analytical expressions are a powerful basis for generating and  
616 testing hypotheses across a range of scenarios. To exemplify this power, we enumerated  
617 five mechanisms that account for the intermediate sizer-adder behavior between birth  
618 and division observed in *A. thaliana* apical stem cells with distinguishing predictions for  
619 other size-homeostasis statistics (Fig. 7). One plausible mechanism assumes CDK1-  
620 cyclin behaves as a master regulator triggering G2/M at a threshold level and is  
621 produced proportionally with cell size rather than growth rate throughout the cell  
622 cycle, thus implying that regulator production scales with bulk synthetic capacity of the  
623 cell (which presumably scales with size) rather than being directly coupled to growth.  
624 Then, if the CVs in cell size at G1/S and G2/M are similar, apparent near-sizer behavior  
625 over S/G2/M, corresponding to a zero correlation between G1/S size and G2/M size, is  
626 predicted (Fig. 7C). These predictions can be readily tested by quantitative time-lapse  
627 imaging of *A. thaliana* apical stem cells in strains containing extant G1/S and membrane  
628 reporters (Jones et al., 2017; Willis et al., 2016).

629

630 Why is adder behavior ubiquitous? Adder regulation may not be evolutionary  
631 advantageous *per se*, but may tend to result from evolutionary pressures on underlying  
632 regulator and growth dynamics with the necessity that catastrophic loss of size control  
633 is avoided. In fission yeast, widely conserved CDK-cyclin-like master regulators trigger  
634 multiple ordered events at successive threshold levels, operating as an “arrow of time”  
635 for the cell cycle (Swaffer et al., 2016). This ordering activity may generate pressures to  
636 degrade the regulator, thus preventing events in previous cell cycles from affecting  
637 future events, and to match the regulator production rate to the biosynthetic capacity of  
638 the cell to ensure events occur only when cellular machineries are sufficiently plentiful.  
639 Then, events are necessarily triggered at a threshold level rather than concentration to  
640 avoid a loss of size control and, for regulators of DNA replication initiation which  
641 persist between intervening divisions such as active DnaA, size-homeostasis robustness  
642 precludes a production rate that deviates strongly from being proportional to growth.  
643 These mechanisms result in apparent adder behavior between birth and division  
644 without implementing a “molecular adder” that specifically effects a fixed added-size  
645 increment. The use of cell size statistics alone to conclude “molecular adders” may lead  
646 to incorrect inferences about the basis of cell-cycle regulation, recalling flawed  
647 conclusions about intrinsic noise derived from a dual reporter system (Hilfinger and  
648 Paulsson, 2011). In slow growing cells where the constraints on the timing of events  
649 may be relatively relaxed, deviations from these mechanisms and thus from adder

650 behavior may arise. Alternatively, adder regulation of S/G2/M may be advantageous in  
651 conferring a robustness to size control against variations in other cell proliferation  
652 factors (Fig. 2A, 3A-C), especially the dynamics of G1/S regulation; in many conditions  
653 and organisms, G1/S occurs shortly after G2/M or division, so the observed adder  
654 regulation between birth and division may be generated by S/G2/M adder regulation.

655

656 In general, our findings exemplify how the model combined with quantitative time-  
657 lapse measurements of cell size dynamics and cell cycle reporters across species,  
658 mutants, and conditions should not only help to establish the mechanisms of cell cycle  
659 regulation, but further illuminate their necessity for size control. Such a fundamental  
660 understanding will inform whether the frequently observed adder behavior emerges  
661 from a common mechanism, is a product of convergent evolution due to selective  
662 pressures on size homeostasis, or is merely a manifestation of specific regimes of  
663 mechanisms without molecular adders that happened to have been the focus of  
664 experiments thus far. The intimate connections between size control and other cellular  
665 processes should also be an important factor in probing the response of cells to non-  
666 steady-state conditions and to the future design of artificial cells.

667 **Acknowledgements**

668 The authors thank members of the Huang Laboratory and Clotilde Cadart, Po-Yi Ho,  
669 Benjamin Knapp, and Fred Chang for helpful discussions. This work was supported by  
670 the Allen Discovery Center at Stanford on Systems Modeling of Infection (to K.C.H.)  
671 and the Gatsby Charitable Foundation under Grant GAT3395/PR4 (to H.J.). K.C.H. is a  
672 Chan Zuckerberg Biohub Investigator. This work was also supported in part by the  
673 National Science Foundation under Grant PHYS-1066293 (to K.C.H.) and the hospitality  
674 of the Aspen Center for Physics.

675

676 **Author Contributions**

677 Conceptualization, L.W., H.J., and K.C.H.; Methodology, L.W. and K.C.H.; Formal  
678 analysis, L.W.; Writing-Original draft, L.W. and K.C.H.; Writing-Review and editing,  
679 L.W., H.J., and K.C.H.; Funding acquisition, L.W., H.J., and K.C.H.

680

681 **Declarations of Interests**

682 The authors declare no competing interests.

683

684 **Figure Legends**

685

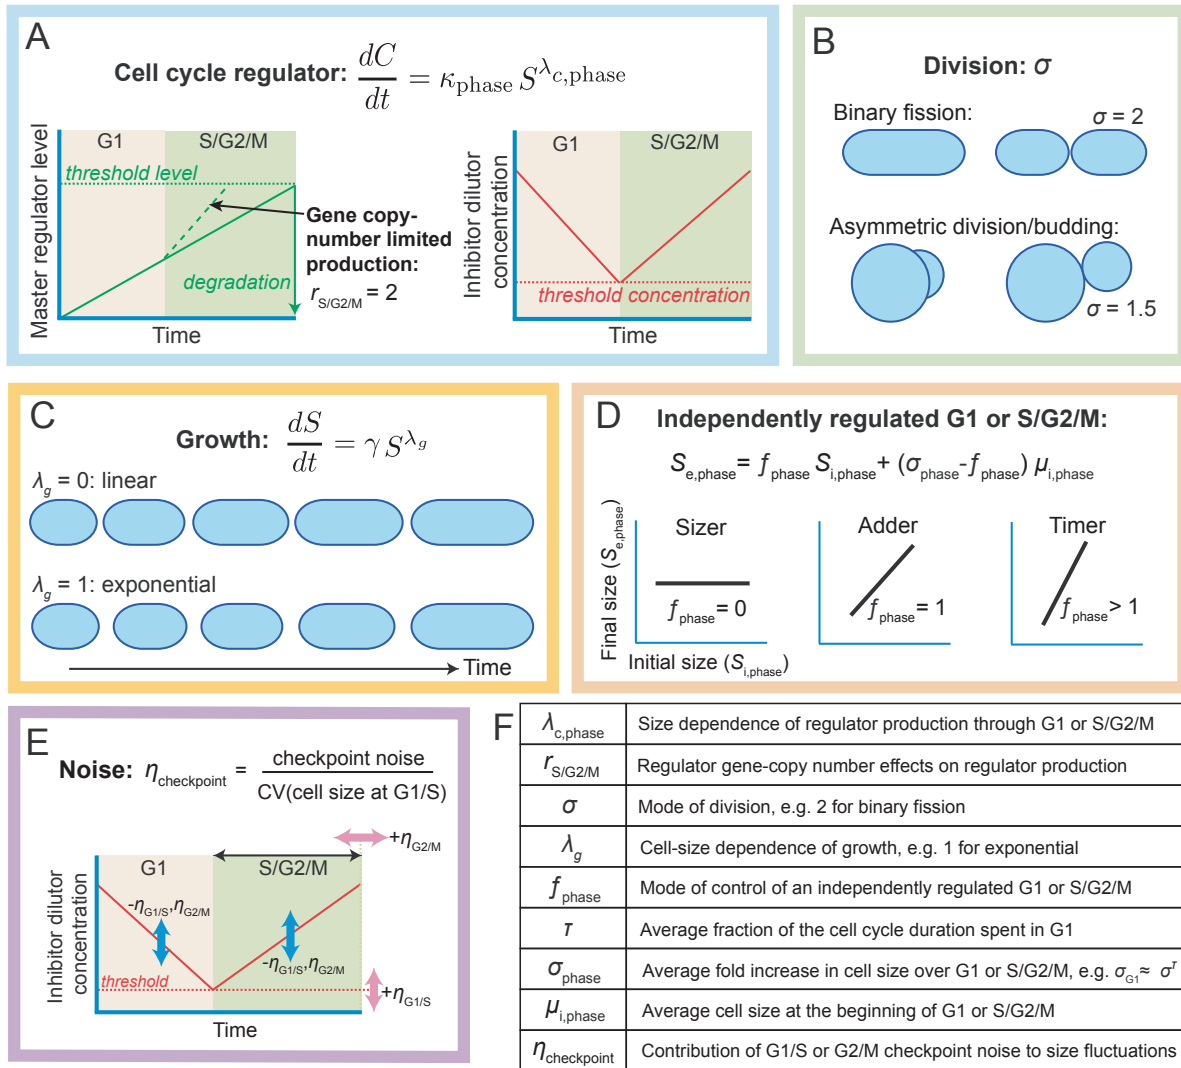

686

687 **Figure 1: A general model of cell proliferation with two cell-cycle checkpoints.**

688 (A) The dependence of cell-cycle regulator production rate  $\left(\frac{dC}{dt}\right)$  on cell size ( $S$ ) is

689 dictated by  $\lambda_{c,\text{phase}}$ , with the phase corresponding to either G1 or S/G2/M.

690  $\lambda_{c,\text{phase}} = 1$  corresponds to size-proportional production. Master regulators (left)

691 are produced throughout one or both phases at a rate that may increase with

692 gene-copy number (corresponding to  $r_{S/G2/M} = \kappa_{S/G2/M}/\kappa_{G1} = 2$ ) to trigger G1/S  
693 or G2/M at a threshold total intracellular level, and then are degraded. Inhibitor  
694 dilutors (right) are produced throughout one phase only ( $\kappa_{G1} = 0$ ) and then  
695 diluted out in the next, triggering G1/S or G2/M at a threshold concentration.

696 (B) Cell division may occur through binary fission ( $\sigma = 2$ ) or asymmetrically ( $\sigma < 2$   
697 or  $\sigma > 2$ ).

698 (C) Cell growth is exponential, linear, or intermediate ( $\lambda_g = 1, 0$ , or otherwise,  
699 respectively).

700 (D) Cell cycle regulators can operate in combination with an independently  
701 regulated G1 or S/G2/M phase, meaning that the size at the end of the phase  
702 ( $S_{e,phase}$ ) depends only on the size at the beginning of the phase ( $S_{i,phase}$ ) and not  
703 on prior sizes, with the mode of regulation dictated by  $f_{phase}$ :  $f_{phase} = 0, 1$  or  
704 depends on the growth behavior for critical size ("sizer"), adder, or timer  
705 regulation, respectively.  $\sigma_{phase}$  is the steady state average fold increase in cell size  
706 over the phase;  $\sigma_{G1} \approx \sigma^\tau$ , where  $\tau$  is the fraction of the cell cycle taken up by G1,  
707 and  $\sigma_{S/G2/M} \approx \sigma^{1-\tau}$ . The average initial size  $\mu_{i,phase}$  can be expressed in terms of  
708 other model parameters (Table S1, SI).

709 (E) Cell-size fluctuations are due to noise in regulator dynamics and cell-cycle  
710 checkpoints. Noise effects are summarized by  $\eta_{G1/S}$  and  $\eta_{G2/M}$ , corresponding to  
711 the noise in the G1/S and G2/M checkpoint criteria, respectively, divided by the

712 coefficient of variation (CV) in G1/S size. For example, the G2/M checkpoint  
713 noise of S/G2/M timer control is generated by noise in the fixed time period  
714 between G1/S and G2/M (horizontal pink arrow); for G1/S inhibitor dilutors,  
715 noise in the minimum threshold concentration generates the G1/S checkpoint  
716 noise (vertical pink arrow). Noise sources that increase CV(cell size at G1/S)  
717 without affecting noise in the checkpoint criteria, for example noise in the  
718 production or dilution of the inhibitor (blue arrows), reduce  $\eta_{G1/S}$  and  $\eta_{G2/M}$ .  
719 (F) Definitions of key parameters determining size-homeostasis behaviors.

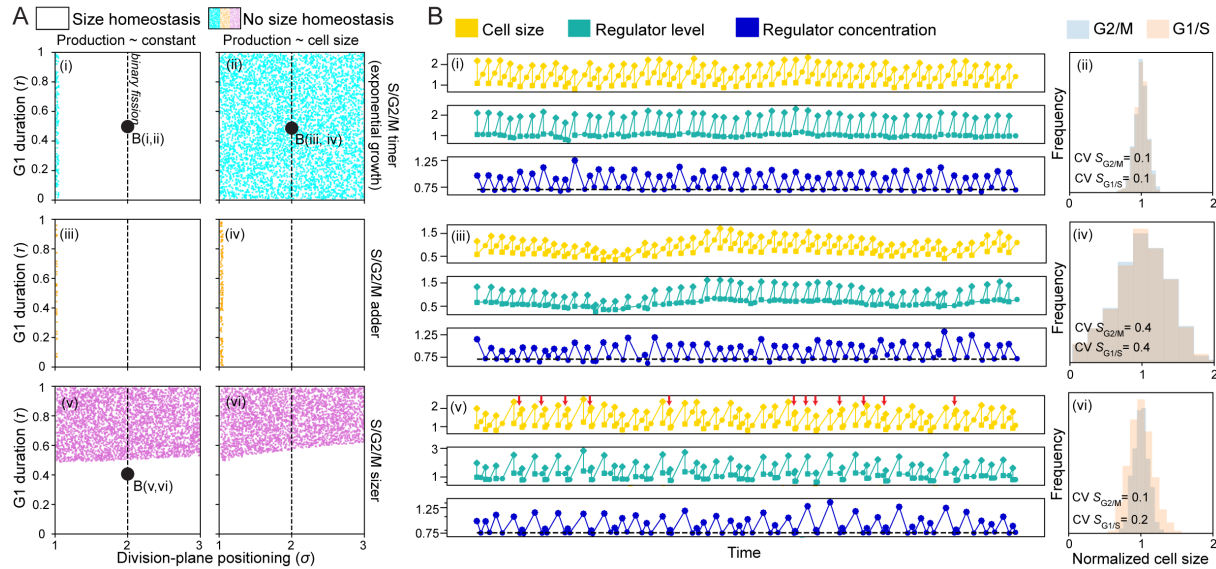

720

721 **Figure 2: G1/S inhibitor dilutors combined with S/G2/M size or timer regulation can**  
 722 **fail to achieve size homeostasis.**

723 (A) Colored regions indicate where G1/S size homeostasis is lost (as defined by  
 724 analytical results for exponentially growing cells ( $\lambda_g = 1$ ) with G1/S inhibitor-  
 725 dilution control in which the absolute value of the slope of G1/S size in  
 726 generation  $n$  vs. generation  $n+1$  is  $>0.95$ ) for a range of division-plane positions  
 727 ( $\sigma$ ; x-axis), G1 durations ( $\tau$ ; y-axis), different modes of S/G2/M regulation (rows),  
 728 and inhibitor production being constant (left) or proportional to cell size (right).  
 729 If S/G2/M is under timer regulation, size homeostasis is predicted to be achieved  
 730 if production is not size-dependent ( $\lambda_{c,S/G2/M} = 0$ ) (i) but generally lost if  
 731 inhibitor production is proportional to cell size ( $\lambda_{c,S/G2/M} = 1$ ) (ii). Regardless of  
 732 growth and production patterns, G1/S inhibitor dilutors are also predicted to be  
 733 incompatible with the combination of G2/M size regulation and long G1



734 durations ( $\tau \geq 0.5$ ) (v,vi). S/G2/M adder regulation generally maintains size  
735 homeostasis (iii,iv). Black circles correspond to single cell lineages simulated in  
736 (B).

737 (B) Simulations of single cell lineages with realistic noise levels confirm analytical  
738 results. (i,ii) Cell size, inhibitor level, and inhibitor concentration control are  
739 achieved for a budding yeast-like inhibitor dilutor ( $\lambda_{c,S/G2/M} = 0, \sigma = 2, \tau = 0.5$ )  
740 in exponentially growing cells ( $\lambda_g = 1$ ) with S/G2/M timer regulation and  
741 realistic noise levels (coefficient of variation (CV) of G2/M size  $\approx 0.1$ , produced  
742 by noise terms  $\xi_{c,G1}, \xi_{c,S/G2/M}, \xi_{G1/S}, \xi_{G2/M} = 0.03$ , Methods), as demonstrated by a  
743 cell lineage (left) and the corresponding G1/S and G2/M size distributions (right).  
744 In the cell lineage, squares, circles, and diamonds denote birth, G1/S, and G2/M  
745 (division), respectively. (iii, iv) For the same noise levels as in (i,ii), cell-size  
746 control was nearly lost when the inhibitor's production was  $\lambda_{c,S/G2/M} = 0.95 \approx$   
747  $\lambda_g = 1$  (the same size dependence as growth). The size distributions (iv) show  
748 that transitions frequently occur at  $\sim 10\%$  or  $\sim 200\%$  of the usual size. (v,vi) G2/M  
749 size control causes loss of G1/S size homeostasis if the G1 duration is long ( $\sigma =$   
750  $2, \tau = 0.4$  are at the boundary of G1/S size homeostasis, as indicated in Fig. 2A(v);  
751 CV of G2/M size  $\approx 0.1$ , produced by  $\xi_{c,G1}, \xi_{c,S/G2/M}, \xi_{G1/S} = 0.01, \xi_{G2/M} = 0.1$ ,  
752 Methods). Red arrows point to cell cycles where G1/S occurred near the end of  
753 the cell cycle; in the following cell cycle, G1/S tends to occur early. The G1/S size

754 distribution (vi) shows G1/S frequently occurs at ~60% or ~140% of the average  
755 G1/S size, and therefore at  $\sim 0.6 \sigma_{G1} = 0.6 2^{\tau} = 0.8$  or  $\sim 1.4 \sigma_{G1} = 1.4 2^{\tau} = 1.8$  of the  
756 average birth size.

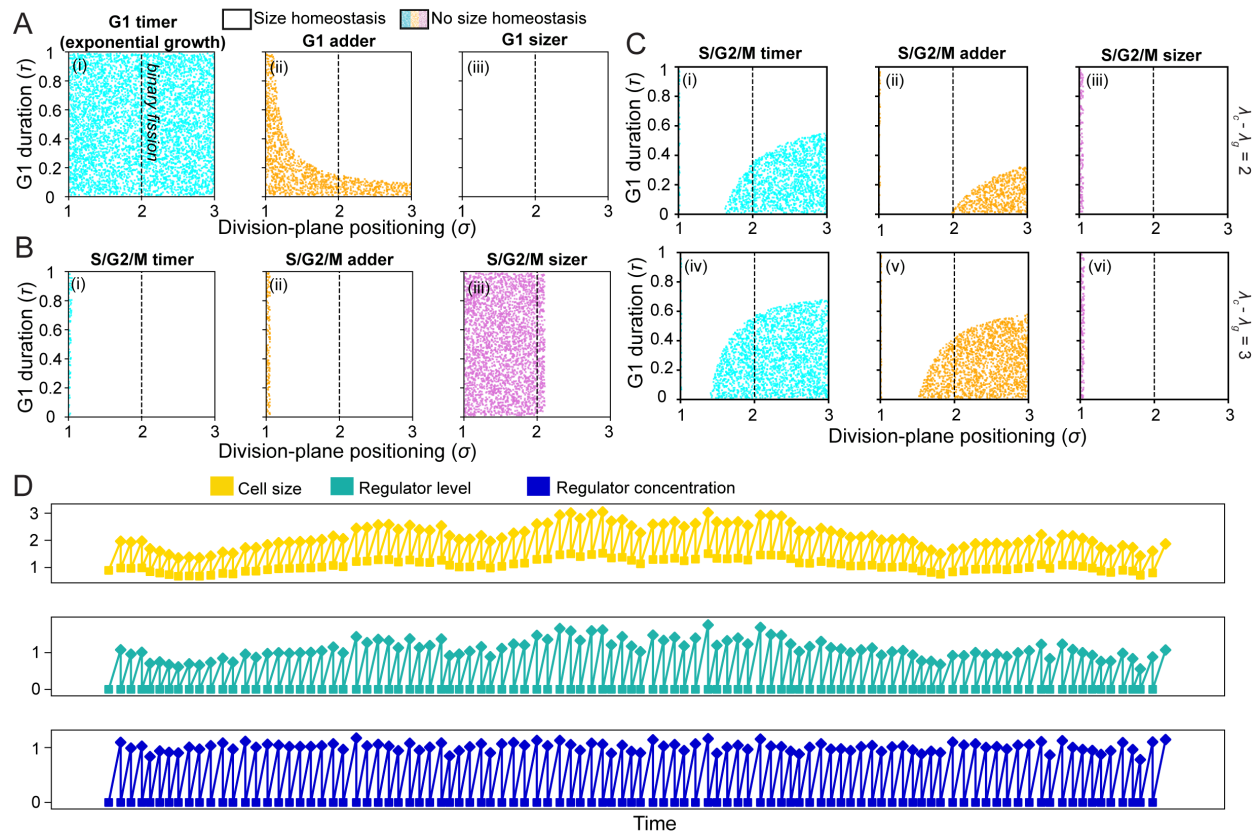

757

758 **Figure 3: Master regulators can lose cell-size control when production is gene copy-**  
 759 **number limited or strongly size-dependent, or a threshold concentration rather than**  
 760 **level triggers phase progression.**

761 (A) G2/M two-phase master regulators with size-independent production rates

762 ( $\lambda_{c,G1} = \lambda_{c,S/G2/M} = 0$ ) can achieve cell-size regulation in exponentially growing  
 763 cells ( $\lambda_g = 1$ ) if their production rate is gene copy-number limited ( $r_{S/G2/M} = 2$ )  
 764 while G1 is under sizer (iii) or adder (ii) regulation, but not timer regulation (i).

765 Colored regions indicate parameters in which G2/M size homeostasis is lost.

766 (B) G1/S two-phase master regulators with gene copy-number limited production

767 that have the same size-dependencies as growth ( $\lambda_{c,G1} = \lambda_{c,S/G2/M} = \lambda_g$ ) achieve  
768 size homeostasis for S/G2/M adder (ii) and timer (i) regulation, but are  
769 incompatible with G2/M sizer regulation when  $\sigma \leq 2$  (iii). Colored regions  
770 indicate parameters in which G1/S size homeostasis is lost.

771 (C) G1/S two-phase master regulators with strongly size-dependent production ( $\lambda_c -$   
772  $\lambda_g = 2$  (top) or 3 (bottom) where  $\lambda_c = \lambda_{c,G1} = \lambda_{c,S/G2/M}$ ) and no gene-copy  
773 number effects fail to achieve size homeostasis for S/G2/M timer (i,iv) and adder  
774 (ii,v) regulation for long S/G2/M durations ( $1 - \tau > 0.5$ ) and binary fission ( $\sigma \geq$   
775 2). Colored regions indicate parameters in which G1/S size homeostasis is lost.

776 (D) The size (i), regulator level (ii), and regulator concentration (iii) trajectories of a  
777 cell lineage governed by a two-phase master regulator that is produced from an  
778 initial level of zero and triggers G2/M at a noisy threshold concentration instead  
779 of a noisy threshold total intracellular level, with size-dependent production  
780  $\lambda_c = \lambda_{c,G1} = \lambda_{c,S/G2/M} = 1.05$  similar to the size-dependence of growth  $\lambda_g = 1$ .  
781 Cell size fluctuates dramatically as  $\lambda_c$  approaches  $\lambda_g$ , and size control is lost in  
782 the limit that  $\lambda_c = \lambda_g$ . Squares and diamonds denote birth and G2/M (division),  
783 respectively.

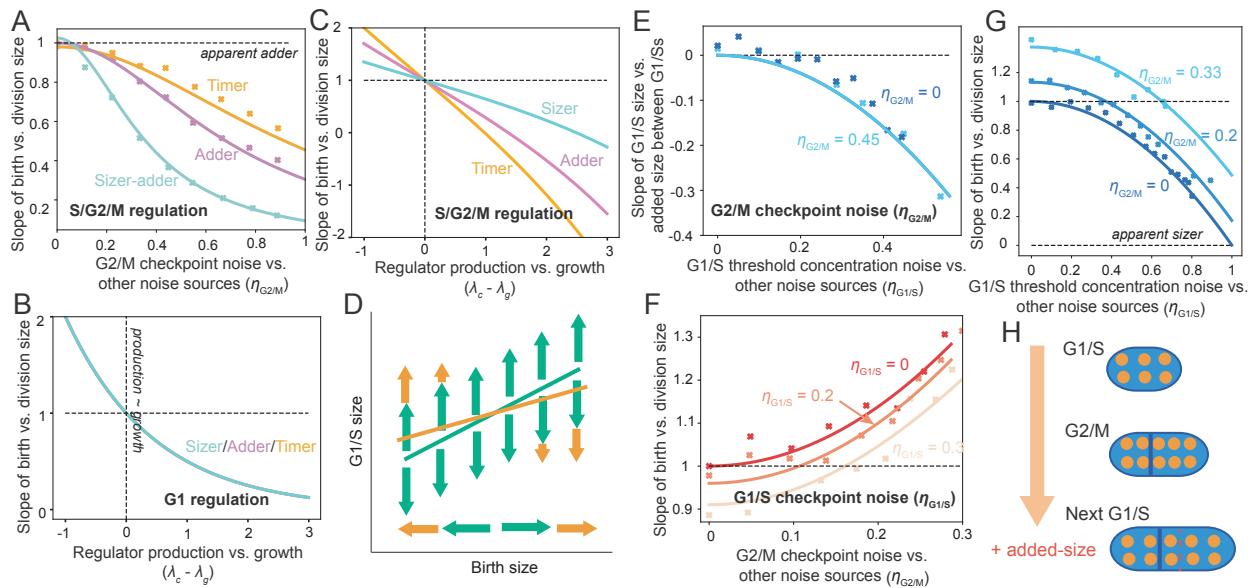

784

785 **Figure 4: Cell-cycle regulation mechanisms can produce various apparent size**

786 **homeostasis behaviors depending on factors such as noise and regulator production.**

787 (A) G1/S two-phase master regulators that are produced in proportion to growth

788 ( $\lambda_c = \lambda_g$ ,  $r_{S/G2/M} = 1$  in Eq. 1) exhibit a linear regression slope of  $\sim 1$  between

789 birth and division regardless of the S/G2/M regulatory mode, representing

790 apparent adder behavior, as long as the G2/M checkpoint makes a weak

791 contribution to size fluctuations ( $\eta_{G2/M} \ll 1$ ). Analytical approximations (solid

792 lines, SI) agree with exact simulations (symbols) for realistic noise levels (CV of

793 G1/S size  $\approx$  CV of G2/M size  $\approx 0.1$ ). In the plots,  $\sigma_{S/G2/M} = 1.4$  was assumed.

794 (B) G2/M two-phase master regulators produce slopes  $\sim 0$  and thus near-sizer

795 behaviors when production is strongly size-dependent with no gene copy-

796 number effects ( $\lambda_c > \lambda_g$ ,  $r_{S/G2/M} = 1$  in Eq. 2) regardless of the G1 regulatory

797 mode (the curves for G1 timer, adder, and sizer regulation are all identical) and  
798 noise levels. Here, binary fission ( $\sigma = 2$ ) was assumed.

799 (C) By contrast, G1/S two-phase master regulators tend to produce negative slopes  
800 for strongly size-dependent production with no gene copy-number effects ( $\lambda_c >$   
801  $\lambda_g$ ,  $r_{S/G2/M} = 1$  in Eq. 1). Here, weak G2/M checkpoint noise ( $\eta_{G2/M} \ll$   
802 1),  $\sigma_{S/G2/M} = 1.4$ , and  $\sigma = 2$  were assumed.

803 (D) Among G1/S two-phase master regulators, relatively high noise in the G2/M  
804 checkpoint mechanism results in small or large cells at birth with low or high  
805 regulator levels, respectively. Small cells then grow more and thus produce more  
806 regulator to achieve the surplus regulator level for G1/S progression (orange  
807 arrows). Noise sources that impact the regulator's production are uncoupled  
808 from initial birth size, and thus do not affect the size homeostasis behavior  
809 between birth and G1/S (green arrows).

810 (E-G) Depending on which processes make the largest contributions to cell-size  
811 fluctuations, a budding yeast-like G1/S inhibitor-dilutor with S/G2/M timer  
812 regulation can generate a variety of size homeostasis behaviors as represented by  
813 the linear regression slopes among size variables: if noise in inhibitor dynamics  
814 primarily generates G1/S size fluctuations ( $\eta_{G1/S} \ll 1$ ,  $\eta_{G2/M} \ll 1$  in Eq. 4),  
815 apparent adder behavior results between consecutive G1/Ss (E) and birth and  
816 division (F,G).  $\eta_{G1/S} \ll 1$  requires stringent control of G1/S.

817 (H) Addition of a constant amount of inhibitor (orange spots) over S/G2/M achieves  
818 adder size homeostasis between consecutive G1/Ss, because added size scales  
819 with amount of inhibitor produced owing to the threshold inhibitor  
820 concentration requirement for G1/S progression.

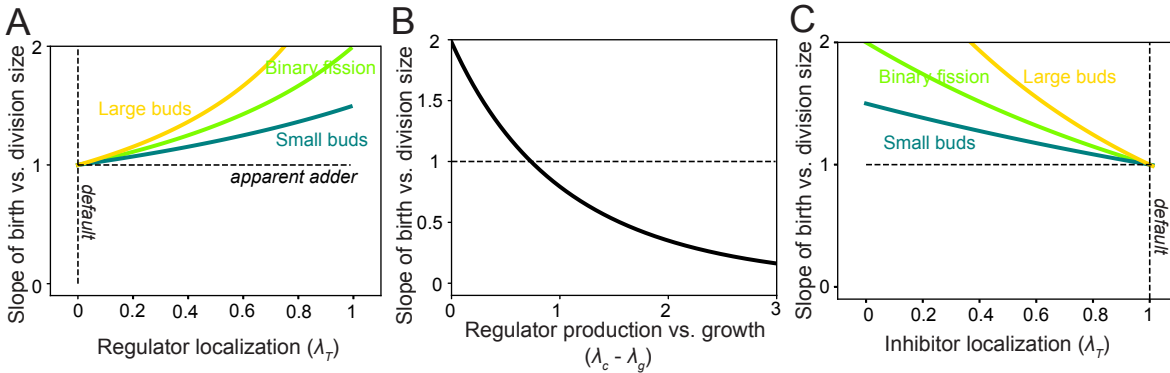

821

822 **Figure 5: Deviations in regulator localization patterns cause supra-adder behaviors.**

823 (A) G2/M two-phase master regulators that localize to a region that scales with cell

824 size as  $S^{\lambda_T}$  to trigger checkpoint progression at a threshold density produce a

825 slope between birth and division size of  $\frac{1}{1-\lambda_T(1-\sigma^{-1})}$ , generating supra-adder

826 behavior as  $\lambda_T$  deviates from zero (the model's default scenario), assuming

827 regulator production is proportional to growth ( $\lambda_g = \lambda_c$  in Eq. 5). (Yellow, light

828 green, or dark green lines are for  $\sigma = 3, 2,$  or  $1.5$ ).

829 (B) For a G2/M threshold concentration rather than threshold level, the slope

830 between birth and division size is  $\frac{1+\Delta\lambda}{\sigma^{-1}+\Delta\lambda\sigma\Delta\lambda}$  where  $\Delta\lambda = \lambda_c - \lambda_g$  (assuming

831  $r_{S/G2/M} = 1$ ), which gives adder behavior when  $\Delta\lambda \approx 0.7$  for binary fission ( $\sigma = 2$ ).

832 (C) Budding yeast-like G1/S inhibitor dilutors that localize to a region that scales

833 with cell size as  $S^{\lambda_T}$  to trigger phase progression at a threshold density produce

834 a slope between birth and division size of  $\sigma^{1-\lambda_T}$ , generating supra-adder

835 behavior as  $\lambda_T$  deviates from one (the model's default scenario), assuming a

836 fixed average amount of inhibitor is produced during S/G2/M and noisy



837 inhibitor dynamics ( $\eta_{G1/S}, \eta_{G2/M} \ll 1$  in Eq. 6). (Yellow, light green, or dark green  
838 lines are for  $\sigma = 3, 2$ , or  $1.5$ , respectively).

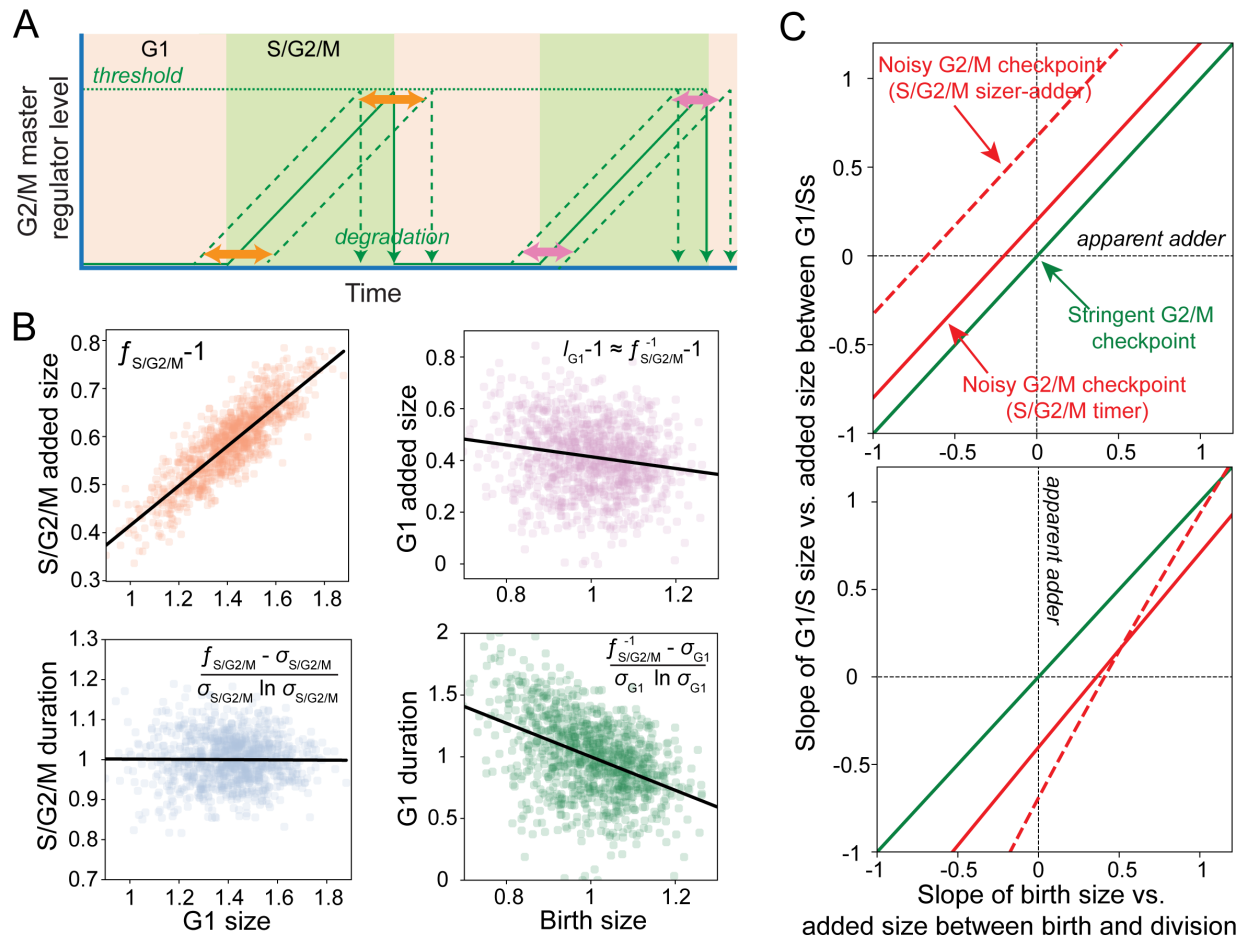

839

840 **Figure 6: Apparent adder regulation between birth and division with non-adder**

841 **regulation over G1 and S/G2/M can be achieved by independently regulated G1/S**

842 **and G2/M transitions.**

843 (A) In independently regulated phases, size fluctuations (orange and pink) depend

844 on events during but not prior to that phase. If G2/M is triggered by a cyclin-like

845 master regulator that accumulates only through S/G2/M and is degraded outside

846 of this phase, then S/G2/M is likely to be independently regulated from G1.

847 (B) Simulations demonstrate a compensatory behavior in which the size added  
848 during G1 offsets the opposite trend over S/G2/M. This behavior is naturally  
849 achieved by control mechanisms that give apparent adder behavior between  
850 birth and division combined with an independently regulated phase. Panels:  
851 Simulated scatter plots of size-homeostasis statistics for a budding yeast-like  
852 G1/S inhibitor dilutor with low checkpoint noise ( $\eta_{G1/S}, \eta_{G2/M} \ll 1$  in Eq. 4) and  
853 the corresponding analytical expressions for the linear regression slopes (SI).  
854 Noise terms:  $\xi_{C,G1}, \xi_{C,S/G2/M} = 0.05, \xi_{G1/S}, \xi_{G2/M} = 0.02$  give realistic size  
855 fluctuations  $CV$  of G1/S size  $\approx CV$  of G2/M size  $\approx 0.1$ .

856 (C) The apparent size-homeostasis behaviors between consecutive G2/Ms and  
857 consecutive G1/Ss are identical if the cell cycle is controlled by one  
858 independently regulated phase with low checkpoint noise (either G1/S or G2/M).  
859 Top: For a G1/S two-phase master regulator combined with an independently  
860 regulated S/G2/M phase and realistic noise levels ( $CV$  of G1/S size  $\approx 0.1$ ), the  
861 same size-homeostasis behavior is observed between birth and division and  
862 consecutive G1/Ss when the G2/M checkpoint is stringent (green line); the  
863 equality is lost as G2/M checkpoint noise contributions increases (red lines).  
864 Different size homeostasis behaviors were achieved by varying the size  
865 dependency of the regulator's production rate ( $\lambda_c$ ). Bottom: results are similar for

866 G1/S inhibitor dilutors combined with an independently regulated S/G2/M  
867 phase.

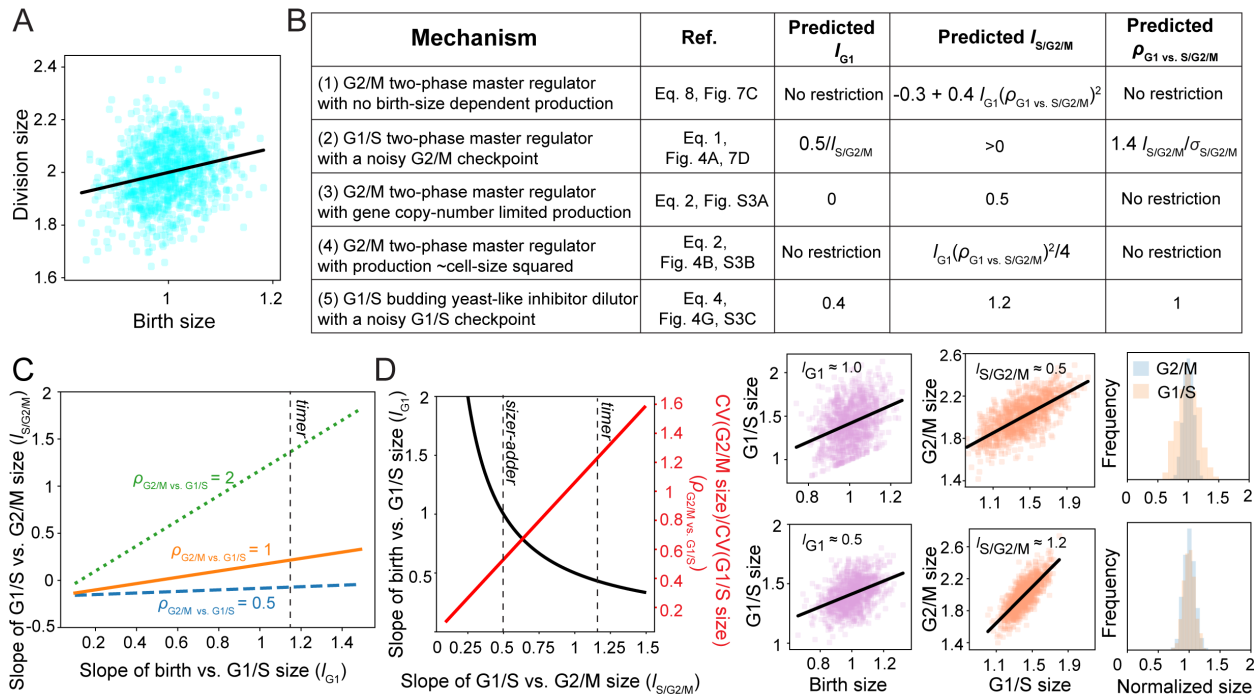

868

869 **Figure 7: Extended size-homeostasis statistics can discriminate among different**

870 **possible mechanisms underlying intermediate sizer-adder behavior.**

871 All simulations are based on realistic noise levels ( $\rho_{G1/S} \approx \rho_{G2/M} \approx 0.1$ ). Solid black

872 lines in scatter plots correspond to linear regression fits.

873 (A) A linear regression slope of  $\approx 0.5$  between birth and division sizes corresponds

874 to the intermediate sizer-adder behavior identified in *A. thaliana* stem cells.

875 (B) A summary of mechanisms (1)–(5) and the relevant equations and figures that

876 generate intermediate sizer-adder behavior, in some cases with distinguishing

877 predictions for the linear regression slopes between birth and G1/S sizes ( $l_{G1}$ ) and

878 G1/S and G2/M sizes ( $l_{S/G2/M}$ ), and the ratio of the CVs in G2/M size vs. G1/S size

879 ( $\rho_{G2/M \text{ vs. } G1/S}$ ).

880 (C) Mechanism 1: A G2/M two-phase master regulator produced in proportion to  
881 cell size with no birth-size or gene copy-number. Predictions for  $l_{S/G2/M}$  depend  
882 on  $l_{G1}$  and  $\rho_{G2/M \text{ vs. } G1/S}$ : there is apparent near-sizer behavior over S/G2/M  
883 ( $l_{S/G2/M} \approx 0.0$ ) if the CV in G1/S size exceeds or equals that of G2/M size  
884 ( $\rho_{G2/M \text{ vs. } G1/S} \leq 1$ ).

885 (D) Mechanism 2: A G1/S two-phase master regulator produced in proportion to  
886 growth with noisy supra-sizer S/G2/M regulation such that  $\eta_{G2/M} \approx$   
887  $f_{S/G2/M}/\sigma_{S/G2/M}$ . Different modes of independently regulated S/G2/M control  
888 ( $f_{S/G2/M} = l_{S/G2/M}$ ) predict different  $l_{G1}$ s and  $\rho_{G2/M \text{ vs. } G1/S}$  (left); for example,  
889 S/G/M intermediate sizer-adder vs. timer regulation ( $l_{S/G2/M} = 0.5$  vs.  $l_{S/G2/M} =$   
890  $1.2$ ) predict  $l_{G1} \approx 1.0$  and  $\rho_{G2/M \text{ vs. } G1/S} \approx 0.6$  (right, top row) vs.  $l_{G1} \approx 0.5$  and  
891  $\rho_{G2/M \text{ vs. } G1/S} \approx 1.5$  (right, bottom row), respectively. In the simulations, noise  
892 terms  $\xi_{C,G1}, \xi_{C,S/G2/M}, \xi_{G1/S} = 0.12$ ;  $\xi_{G2/M} = 0.06$  (top);  $\xi_{C,G1}, \xi_{C,S/G2/M}, \xi_{G1/S}, \xi_{G2/M} =$   
893  $0.06$  (bottom) produce realistic CVs of cell size  $\approx 0.1$ . Mechanisms (3–5) in panel  
894 (B) are represented in Fig. S3.

895 **Supplemental Figures**

896

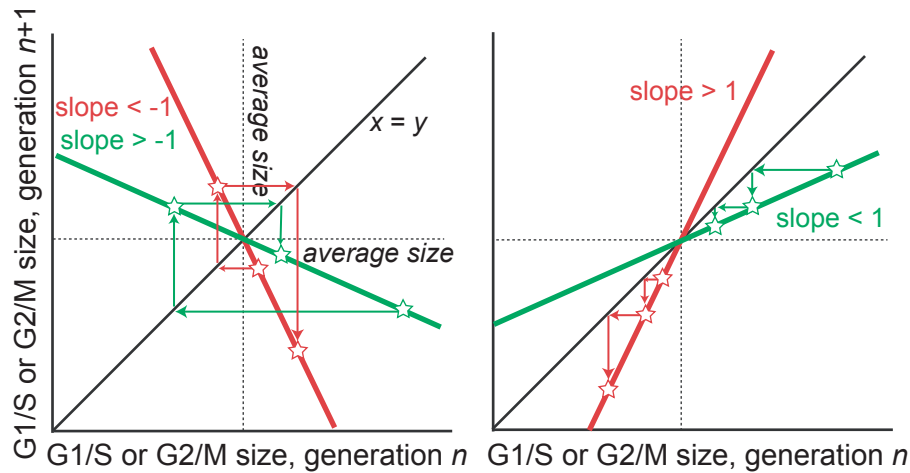

897

898 **Figure S1: Conditions for loss of cell-size homeostasis.** Related to Figures 2 and 3. For

899 cells to achieve control of G1/S or G2/M size, the linearized relationship between cell

900 sizes at G1/S or G2/M in consecutive cell cycles must have a slope between -1 and 1

901 (green trajectories). Size fluctuations then regress to the average, as opposed to

902 diverging (red trajectories).

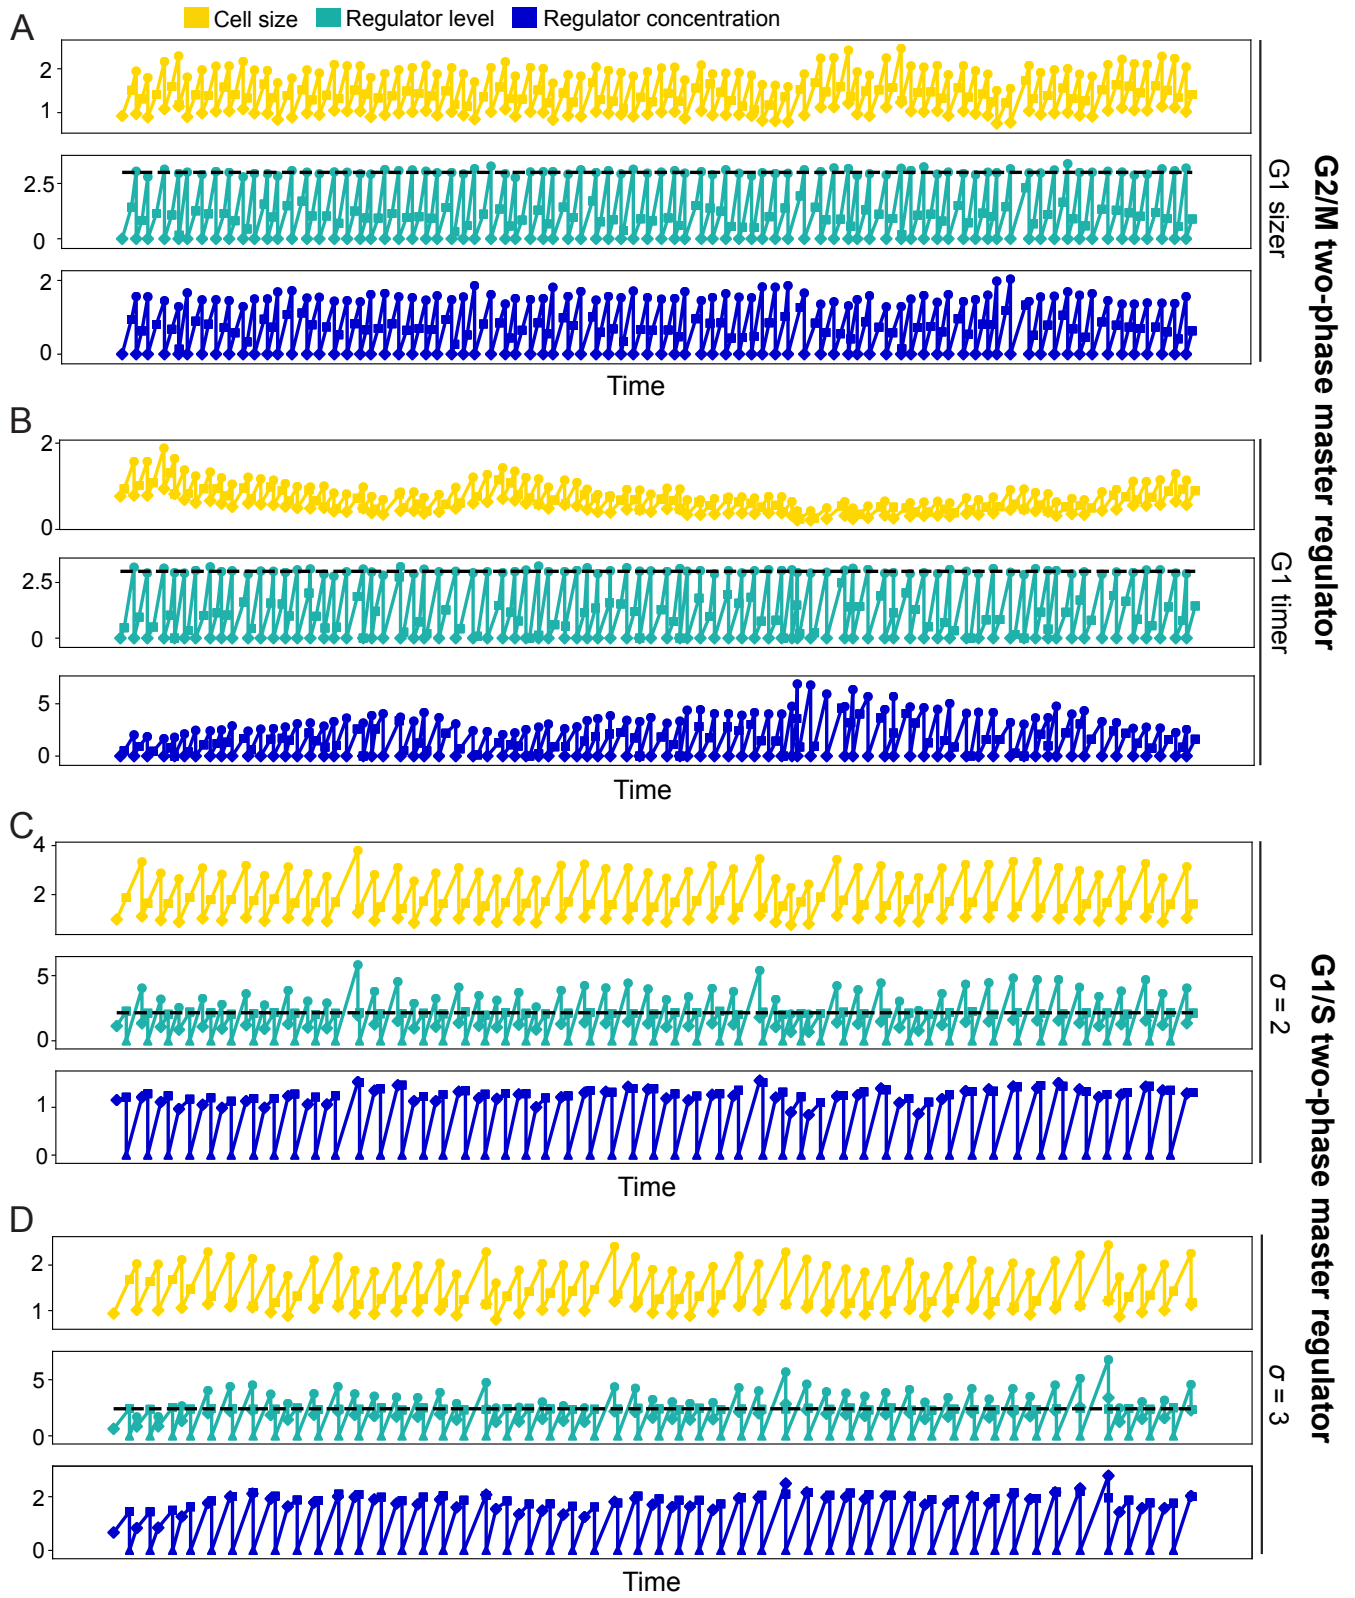



904 **Figure S2: Simulations of single-cell lineage trajectories support analytical findings.**

905 Related to Figure 3. G2/M and G1/S master regulators produced through both phases  
906 (two-phase master regulators) fail to implement size homeostasis under certain  
907 conditions.

908 (A,B) For exponentially growing cells ( $\lambda_g = 1$ ), when regulator production is gene  
909 copy-number limited ( $r_{S/G2/M} = 2$ ), G2/M two-phase master regulators produced  
910 at a size-independent rate ( $\lambda_{c,G1/S} = \lambda_{c,S/G2/M} = 0$ ) achieve size homeostasis for  
911 G1 critical size or adder control regardless of the average G1 duration ( $\tau$ ), but fail  
912 to achieve size homeostasis for G1 timer control (Fig. 3A, Table S2). (A) shows  
913 size and regulator level homeostasis for G1 critical size regulation ( $f_{G1} = 0$ ,  $\tau =$   
914  $0.5$ ,  $\sigma = 2$ ; noise terms  $\xi_{c,G1}, \xi_{c,S/G2/M} = 0.05$ ,  $\xi_{G1/S}, \xi_{G2/M} = 0.1$  produce a CV of  
915 cell size  $\approx 0.1$ ); (B) shows the loss of homeostasis when G1 control approaches  
916 timer ( $f_{G1} = 0.99 \sigma^\tau$ ) while other parameters remain fixed. Diamonds, squares,  
917 and discs denote values at birth, G1/S, and G2/M or division, respectively.

918 (C,D) G1/S two-phase master regulators that are gene copy-number limited fail to  
919 implement G1/S size homeostasis when combined with G2/M sizer regulation  
920 ( $f_{S/G2/M} = 0$ ) for binary fission or asymmetric division with  $\sigma \leq 2$ , regardless of  
921 G1 duration, the size dependence of regulator production, and growth pattern  
922 (Fig. 3B, Table S2); (C) shows size homeostasis for gene copy-number limited  
923 ( $r_{S/G2/M} = 2$ ) G1/S two-phase master regulators when  $\sigma = 3$  ( $\tau = 0.5$ , linear

924 growth pattern  $\lambda_g = 0$ ; regulator production  $\lambda_{c,G1/S} = \lambda_{c,S/G2/M} = 0$ ; and noise  
925 terms  $\xi_{c,G1}, \xi_{c,S/G2/M}, \xi_{G1/S} = 0.02, \xi_{G2/M} = 0.1$  producing a CV of cell size  $\approx 0.1$ );  
926 (D) shows the loss of G1/S size homeostasis when  $\sigma = 2$  while other parameters  
927 remain fixed. Diamonds, squares, triangles, and discs denote values at birth,  
928 G1/S, immediately after G1/S when the regulator is degraded, and G2/M or  
929 division, respectively. Horizontal dashed lines show the threshold regulator level  
930 triggering phase progression.

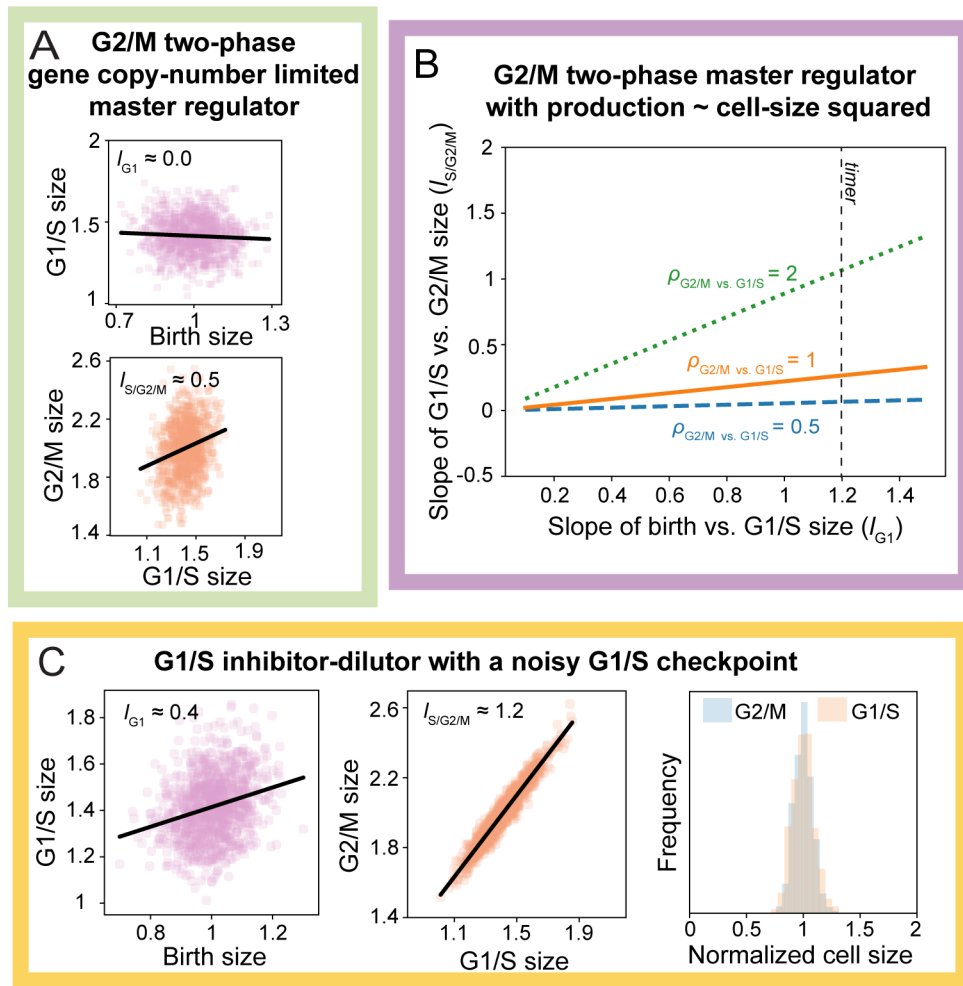

931

932 **Figure S3: Extended size-homeostasis statistics can discriminate among different**  
 933 **possible mechanisms underlying intermediate sizer-adder behavior.** Related to Figure  
 934 7; the panels represent mechanisms (3-5) listed in Fig. 7B. In all simulations, noise terms  
 935 were set to produce realistic CVs of cell size  $\approx 0.1$ .

936 (A) Mechanism 3: A G2/M two-phase master regulator produced in proportion to

937 cell size ( $\lambda_{c, \text{phase}} = 1$ ) with the same birth-size dependence as growth ( $\alpha_{c, \text{phase}} =$

938             $-0.5$ ) (SI) and gene copy-number limited production ( $r_{S/G2/M} = 2$ ), with the latter  
939            implying that regulator production is not proportional to growth throughout the  
940            cell cycle. Predictions are G1/S sizer regulation ( $l_{G1} \approx 0$ ; top) and apparent sizer-  
941            adder regulation over S/G2/M ( $l_{S/G2/M} \approx 0.5$ ; bottom). In the simulation, noise  
942            terms were  $\xi_{c,G1}, \xi_{c,S/G2/M}, \xi_{G1/S}, \xi_{G2/M} = 0.08$ .

943            (B) Mechanism 4: A G2/M two-phase master regulator produced in proportion to  
944            cell-size squared ( $\lambda_{c,G1} = \lambda_{c,S/G2/M} = 2$ ) with no gene copy-number effect  
945            ( $r_{S/G2/M} = 1$ ) and the same birth-size dependence as growth ( $\alpha_{c,G1} = \alpha_{c,S/G2/M} =$   
946             $-0.5$ ) (SI). Predictions are similar to mechanism (1) (Fig. 7C).

947            (C) Mechanism 5: A G1/S budding yeast-like inhibitor-dilutor with high G1/S  
948            checkpoint noise. Further predictions are intermediate sizer-adder behavior over  
949            G1 ( $l_{G1} \approx 0.4$ ), apparent near adder behavior over S/G2/M ( $l_{S/G2/M} \approx 1.2$ ), and  
950            similar coefficients of variation in G1/S and G2/M sizes ( $\rho_{G2/M \text{ vs. } G1/S} \approx 1$ ). In the  
951            simulation, noise terms were  $\xi_{c,G1}, \xi_{c,S/G2/M}, \xi_{G2/M} = 0.02$ ;  $\xi_{G1/S} = 0.08$ .

952 **Table S1.**

953 Average birth size ( $\mu_{i,G1}$ ) is determined by model parameters. Left: Average birth  
 954 size for a G2/M two-phase master regulator where growth and regulator production  
 955 have the same size dependences in both phases  $\lambda_g = \lambda_{c,G1} = \lambda_{c,S/G2/M}$ ; Fig. 1A,C),  $\Theta$   
 956 is the threshold level for G2/M, and  $\Theta_{deg}$  is the fixed level that the regulator is  
 957 degraded to following G2/M. Middle: Average birth size for a G1/S two-phase  
 958 master regulator where growth and regulator production have the same size  
 959 dependencies in both phases ( $\lambda_g = \lambda_{c,G1} = \lambda_{c,S/G2/M}$ ). Right: Average birth size for a  
 960 G1/S inhibitor dilutor that triggers G1/S at a minimum concentration  $k_{thres}$  with a  
 961 growth size dependence that exceeds the regulator production's size dependence as  
 962 in budding yeast ( $\lambda_g - \lambda_{c,S/G2/M} = 1$ ). See SI for similar expressions in more general  
 963 cases.

| Average birth size<br>G2/M two-phase master regulator                                                                                | Average birth size<br>G1/S two-phase master regulator                                                                                      | Average birth size<br>G1/S inhibitor dilutor                                              |
|--------------------------------------------------------------------------------------------------------------------------------------|--------------------------------------------------------------------------------------------------------------------------------------------|-------------------------------------------------------------------------------------------|
| $\frac{\Theta - \Theta_{deg}}{\frac{\kappa_{G1}}{\gamma} (\sigma^\tau - 1) + \frac{\kappa_{S/G2/M}}{\gamma} (\sigma - \sigma^\tau)}$ | $\frac{\Theta - \Theta_{deg}/\sigma}{\frac{\kappa_{S/G2/M}}{\gamma} (1 - \sigma^{\tau-1}) + \frac{\kappa_{G1}}{\gamma} (\sigma^\tau - 1)}$ | $\frac{\ln \sigma (1 - \tau) \kappa_{S/G2/M}}{\sigma^\tau (\sigma - 1) \gamma k_{thres}}$ |

964

965 **Table S2.**

966 Expressions for the slopes between first-order cell-size fluctuations away from the  
967 mean at consecutive G2/Ms and consecutive G1/Ss in the absence of noise (Methods,  
968 SI). When the absolute values of these slopes exceed 1, as shown in the colored  
969 regions of Figs. 2A and 3A-C, size homeostasis is lost (Methods, Fig. S1). In these  
970 figures, cell cycles are controlled by a two-phase master regulator or an inhibitor  
971 dilutor of G1/S or G2/M combined with an independently regulated phase, for  
972 example, timer, adder, or sizer regulation corresponding to  $f_{\text{phase}} = \sigma_{\text{phase}}, 1$ , or  $0$ ,  
973 respectively. Here, we assumed: for two-phase master regulators, production and  
974 growth have the same size-dependencies through both phases ( $\Delta\lambda = \lambda_g - \lambda_{c,G1} =$   
975  $\lambda_g - \lambda_{c,S/G2/M}$ ); growth is exponential, so  $\lambda_g = 1$  and  $\sigma_{G1} = \sigma^\tau$  (Methods, Fig. 1F). For  
976 two-phase master regulators, expressions are for no effect of gene copy number on  
977 regulator production ( $r_{S/G2/M} = 1$ , Fig. 1A), or a strong limiting effect of gene copy  
978 number ( $r_{S/G2/M} = 2$ ). The fully general expressions are in SI.

979

**G1/S inhibitor dilutor.** Plotted in Fig. 2A with  $\Delta\lambda = 1$  (i,iii,v) or  $\Delta\lambda = 0$  (ii,iv,vi).

**Linear slopes between consecutive G2/M sizes**

| S/G2/M sizer | S/G2/M adder | S/G2/M timer (exponential growth) |
|--------------|--------------|-----------------------------------|
| 0            | As for G1/S  | As for G1/S                       |

**Linear slopes between consecutive G1/S sizes**

| S/G2/M sizer                                                                                        | S/G2/M adder                                                                                                                               | S/G2/M timer (exponential growth)                   |
|-----------------------------------------------------------------------------------------------------|--------------------------------------------------------------------------------------------------------------------------------------------|-----------------------------------------------------|
| $\frac{1 - \frac{(\sigma - 1)(1 - \Delta\lambda)}{\sigma^{(1-\tau)(1-\Delta\lambda)} - 1}}{\sigma}$ | $\frac{1 + (\sigma^{-1-\tau})^{\Delta\lambda} - 1}{\sigma} \frac{(\sigma - 1)(1 - \Delta\lambda)}{\sigma^{(1-\tau)(1-\Delta\lambda)} - 1}$ | $\frac{\sigma - \Delta\lambda(\sigma - 1)}{\sigma}$ |

**G2/M two-phase master regulator.** Plotted in Fig. 3A with  $\Delta\lambda = 1$  and  $r_{S/G2/M} = 2$ .

**Linear slopes between consecutive G2/M sizes**

|                  | G1 sizer                              | G1 adder                                                            | G1 timer (exponential growth)                                          |
|------------------|---------------------------------------|---------------------------------------------------------------------|------------------------------------------------------------------------|
| $r_{S/G2/M} = 2$ | $\frac{1}{2\sigma^{1-\Delta\lambda}}$ | $\frac{1 + \sigma^{-\tau\Delta\lambda}}{2\sigma^{1-\Delta\lambda}}$ | $\frac{1 + \sigma^{\tau(1-\Delta\lambda)}}{2\sigma^{1-\Delta\lambda}}$ |
| $r_{S/G2/M} = 1$ | $\frac{1}{\sigma^{1-\Delta\lambda}}$  | $\frac{1}{\sigma^{1-\Delta\lambda}}$                                | $\frac{1}{\sigma^{1-\Delta\lambda}}$                                   |

**Linear slopes between consecutive G1/S sizes**

|                  | G1 sizer | G1 adder    | G1 timer (exponential growth) |
|------------------|----------|-------------|-------------------------------|
| $r_{S/G2/M} = 2$ | 0        | As for G2/M | As for G2/M                   |
| $r_{S/G2/M} = 1$ | 0        | As for G2/M | As for G2/M                   |

**G1/S two-phase master regulator.** Plotted in Fig. 3B with  $\Delta\lambda = 0$  and  $r_{S/G2/M} = 2$ ; Fig. 3C with  $\Delta\lambda = 2$  or  $\Delta\lambda = 3$  and  $r_{S/G2/M} = 1$ .

**Linear slopes between consecutive G2/M sizes**

|                  | S/G2/M sizer | S/G2/M adder | S/G2/M timer (exponential growth) |
|------------------|--------------|--------------|-----------------------------------|
| $r_{S/G2/M} = 2$ | 0            | As for G1/S  | As for G1/S                       |
| $r_{S/G2/M} = 1$ | 0            | As for G1/S  | As for G1/S                       |

**Linear slopes between consecutive G1/S sizes**

|                  | S/G2/M sizer       | S/G2/M adder                                                                  | S/G2/M timer (exponential growth)                                                   |
|------------------|--------------------|-------------------------------------------------------------------------------|-------------------------------------------------------------------------------------|
| $r_{S/G2/M} = 2$ | $\frac{2}{\sigma}$ | $\frac{2 - \sigma^{\tau\Delta\lambda}(2\sigma^{-\Delta\lambda} - 1)}{\sigma}$ | $\frac{2 - \sigma^{\tau(\Delta\lambda-1)+1}(2\sigma^{-\Delta\lambda} - 1)}{\sigma}$ |
| $r_{S/G2/M} = 1$ | $\frac{1}{\sigma}$ | $\frac{1 - \sigma^{\tau\Delta\lambda}(\sigma^{-\Delta\lambda} - 1)}{\sigma}$  | $\frac{1 - \sigma^{\tau(\Delta\lambda-1)+1}(\sigma^{-\Delta\lambda} - 1)}{\sigma}$  |

980

981

982

## 983 **Methods**

984 Below, the model description of average cellular behaviors included in the Results is  
985 extended, then noise, simulations, and analytical derivations are explained.

## 986 **Models**

987 We study two classes of regulators, with total intracellular level  $C$ , that trigger G1/S or  
988 G2/M progression and are produced in a potentially size-dependent manner with  
989 negligible degradation. Parameters  $\lambda_{c,\text{phase}}$  in phases G1 and S/G2/M determine the cell  
990 size ( $S$ ) dependencies of regulator production  $\left(\frac{dC}{dt}\right)$  according to

$$991 \quad (9) \quad \frac{dC}{dt} = \kappa_{\text{phase}} S^{\lambda_{c,\text{phase}}}.$$

992 Master regulators are produced through one or two phases to trigger G1/S or G2/M  
993 progression upon reaching a total intracellular threshold level; degradation follows to a  
994 fixed level (e.g. zero; analyses show the degraded level has no impact on size  
995 homeostasis behaviors, see SI) (Fig. 1A). Inhibitor dilutors are produced throughout one  
996 phase and then diluted out in the subsequent phase to trigger G1/S or G2/M at a  
997 minimum threshold concentration (Fig. 1A). G2/M and division are assumed to be  
998 coincident. Upon division, cells divide symmetrically ( $\sigma = 2$ ) or asymmetrically ( $\sigma \neq 2$ )  
999 in a ratio  $1:(\sigma - 1)$  and any regulator that persists is inherited in proportion to daughter  
1000 cell size (Fig. 1B). Hence, at steady state population dynamics, the overall fold-size  
1001 increase is  $\sigma$ , and division-plane positioning is independent of the preceding birth and  
1002 G1/S sizes. Analyses and simulations assume steady state population dynamics of one



1003 cell type: following each division, only one daughter cell, corresponding to an average  
 1004 portion size of 1 and not  $\sigma - 1$ , is retained for analyses or simulations. The cellular  
 1005 growth rate  $\left(\frac{dS}{dt}\right)$  depends on cell size according to

$$1006 \quad (10) \quad \frac{dS}{dt} = \gamma S^{\lambda_g}$$

1007 where  $\lambda_g$  determines the growth type (exponential for  $\lambda_g = 1$  and linear for  $\lambda_g = 0$ ) and  
 1008  $\gamma$  sets the average timescale for growth (Fig. 1C).

1009  
 1010 Master regulators or inhibitor dilutors are often considered in combination with an  
 1011 independently regulated S/G2/M or G1 phase: cell size at the end of the phase ( $S_{e,phase}$ )  
 1012 depends on cell size at the beginning of the phase ( $S_{i,phase}$ ) according to

$$1013 \quad (11) \quad S_{e,phase} = f_{phase} S_{i,phase} + (\sigma_{phase} - f_{phase}) \mu_{i,phase},$$

1014 where  $f_{phase}$  is the mode of control ( $f_{phase} = 0, 1$ , or depends on growth behavior for  
 1015 “sizer”, “adder”, or “timer” control, respectively),  $\sigma_{phase} > 1$  is the average fold-size  
 1016 increase, and  $\mu_{i,phase}$  is the average initial size at steady state (Fig. 1D). The steady state  
 1017 fold-size increase over G1 and S/G2/M are related to the fraction of the cell cycle spent  
 1018 in G1 ( $\tau$ ) by  $\sigma_{G1} \approx \sigma^\tau$  and  $\sigma_{S/G2/M} \approx \sigma^{1-\tau}$  because  $\sigma_{S/G2/M} = \sigma / \sigma_{G1}$ . (The approximations  
 1019 are exact for exponential growth where the cell cycle duration is  $\ln \sigma / \gamma$ , so  $\tau = \frac{T}{\ln \sigma} / \gamma$  if  $T$   
 1020 is the average G1 duration and  $\sigma_{G1} = \frac{\mu_{i,S/G2/M}}{\mu_{i,G1}} = e^{\gamma T} = e^{\ln \sigma \tau} = \sigma^\tau$ .) A convenient aspect  
 1021 of the model is that the natural choice for free parameters changes as the control type of

1022 the independently regulated phase changes. For example, for an independently  
1023 regulated phase under timer control, the natural free parameter is the duration of the  
1024 phase or the fraction of the cell cycle spent in the phase ( $\tau$ ), whereas for critical size or  
1025 equivalently sizer control, the natural choice is the average cell size at the transition  
1026 ( $\mu_{e,phase}$ ). Regardless of the natural choice, at steady state an equation connecting  $\tau$  and  
1027  $\mu_{i,phase}$  or  $\mu_{e,phase}$  (SI) allows us to work in terms of the parameter  $\tau$  (or  $\sigma_{G1}$ ). Then  
1028 parameter sets that fail to implement cell cycles with two checkpoints on average are  
1029 straightforward to exclude by enforcing  $0 \leq \tau \leq 1$  (Fig. 2A, 3A-C).

1030

1031 More general analyses in SI allow growth and production rates to continually depend  
1032 on cell size at the beginning of the phase, growth parameters  $\lambda_g$  and  $\gamma$  to differ in G1 vs.  
1033 S/G2/M, and the threshold mechanisms for cell cycle checkpoint progression to vary.

1034

### 1035 **Simulations and noise**

1036 Cells were initialized to the steady-state birth size and regulator level plus noise (SI).  
1037 Then, cell sizes and regulator levels at G1/S and G2/M were simulated according to  
1038 specified average cell-cycle control and growth parameters (Eq. 9-11) with 4 noise terms  
1039 in cell-cycle regulation. We present a specific example; the general case is described in  
1040 detail in SI. If an inhibitor dilutor triggers G1/S at a threshold concentration ( $k_{thres}$ ),

1041 then at the end of the G1 dilution phase the regulator level ( $C_{G1/S}$ ) and cell size ( $S_{G1/S}$ )  
 1042 depend on the regulator level at birth ( $C_b$ ) as

$$1043 \quad C_{G1/S} = C_b + k_{\text{thres}} \mu_{e,G1} (\sigma - 1) Z_{C,G1}, \quad S_{G1/S} = C_{G1/S}/k_{\text{thres}} + \mu_{e,G1} Z_{G1/S}$$

1044 where  $Z_{C,G1}$  and  $Z_{G1/S}$  are zero-mean Gaussian noise terms that perturb the level of  
 1045 inhibitor over the G1 dilution phase and the G1/S threshold concentration, respectively.

1046 The noise terms' coefficients give convenient interpretations for the corresponding  
 1047 standard deviations (s.d.). For example,  $\xi_{G1/S}$ , the s.d. of  $Z_{G1/S}$  (equal to the typical G1/S  
 1048 error,  $e_{G1/S}$ , in Results), approximates the coefficient of variation (CV) of the threshold  
 1049 concentration (SI). If S/G2/M is independently regulated, at G2/M, the cell size ( $S_{G2/M}$ )  
 1050 and regulator level ( $C_{G2/M}$ ) are

$$1051 \quad S_{G2/M} = f_{S/G2/M} S_{G1/S} + (\sigma_{S/G2/M} - f_{S/G2/M}) \mu_{i,S/G2/M} + \mu_{e,S/G2/M} Z_{G2/M},$$

$$1052 \quad C_{G2/M} = C_{G1/S} + \int_{S_{G1/S}}^{S_{G2/M} - \mu_{e,S/G2/M}} Z_{C,S/G2/M} \frac{dC}{dS} dS$$

1053 where  $Z_{G2/M}$  is a zero-mean Gaussian noise term that perturbs the G2/M checkpoint,  
 1054  $\int (dC/dS) dS$  is found explicitly from Eq. 9 divided by Eq. 10, and  $Z_{C,S/G2/M}$  is a zero-  
 1055 mean Gaussian noise term in inhibitor production compared with growth through  
 1056 S/G2/M. The interpretation of  $\xi_{G2/M}$ , the s.d. of  $Z_{G2/M}$ , depends on the mode of S/G2/M  
 1057 control (SI); for example, if the control is sizer ( $f_{S/G2/M} = 0$ ),  $\xi_{G2/M}$  is the CV in the G2/M  
 1058 critical cell size. The regulator level and cell size at birth of the retained daughter in the  
 1059 next generation are

1060 
$$C_b' = C_{G2/M}/\sigma, \quad S_b' = S_{G2/M}/\sigma$$

1061 where no noise in division was assumed. Analytical derivations (SI) show that size  
1062 homeostasis behaviors depend on just two noise-related parameters,  $\eta_{G1/S} =$   
1063  $\xi_{G1/S}/CV(\text{cell size at G1/S})$  and  $\eta_{G2/M} = \xi_{G2/M}/CV(\text{cell size at G1/S})$  (Fig. 1E). In general,  
1064 the noise terms that cause deviation from the average coupling between inhibitor  
1065 dynamics and growth,  $Z_{C,G1}$  and  $Z_{C,S/G2/M}$ , contribute to cell size at G1/S without  
1066 affecting  $\xi_{G1/S}$  and  $\xi_{G2/M}$  and thus reduce  $\eta_{G1/S}$  and  $\eta_{G2/M}$ .

1067  
1068 In simulations, growth is forced to be non-negative over each phase, so  $S_b < S_{G1/S} <$   
1069  $S_{G2/M}$ , and regulator levels are forced to be non-negative (SI). This forcing is not  
1070 included in analytical derivations, yet the derivations are in excellent agreement with  
1071 simulations, indicating that it has minimal impact on results. Cells were simulated for  
1072 30+ generations until steady states were patently reached.

1073

## 1074 **Analysis**

1075 Throughout analyses, linear regression slopes between cell-size variables (Eqs. 1-8)  
1076 were derived as follows: scaled cell-size fluctuations at each transition ( $\Delta S_{G1/S} =$   
1077  $S_{G1/S}/\mu_{e,G1} - 1$  and  $\Delta S_{G2/M} = S_{G2/M}/\mu_{e,S/G2/M} - 1$ ) were expressed in terms of scaled size  
1078 fluctuations at earlier transitions, then only linear terms from a Taylor expansion and  
1079 noise terms were retained for analyses, because cell size fluctuations are small (in most

1080 measurements, the coefficient of variation in cell size is  $\sim 0.13$  (Cadart, 2018; Cadart et  
 1081 al., 2018; Taheri-Araghi et al., 2015; Willis et al., 2016)) and noise terms are comparable  
 1082 in magnitude to cell size fluctuations (Amir, 2014). Indeed, analytically derived linear  
 1083 regression slopes are in excellent agreement with simulations with realistic noise levels,  
 1084 indicating that the linear approximation is appropriate (Fig. 2-4).

1085

1086 We present two examples; the general case is detailed in SI. For a one-phase master  
 1087 regulator produced from a fixed level at G1/S through S/G2/M to trigger G2/M when it  
 1088 is degraded, the linearized relationship between  $\Delta S_{G1/S}$  and  $\Delta S_{G2/M}$  is found by solving  
 1089 Eqs. 9 and 10 followed by a Taylor expansion,

$$1090 \quad (12) \quad \Delta S_{G2/M} = \sigma_{S/G2/M}^{\Delta\lambda-1} \Delta S_{G1/S} + Z_{G2/M} + Z_{C,S/G2/M} + \text{higher order terms}$$

1091 where  $\Delta\lambda = \lambda_g - \lambda_{c,S/G2/M}$ . By definition, the linear regression slope between G1/S and  
 1092 G2/M sizes ( $l_{S/G2/M}$ ) is

$$1093 \quad (13) \quad l_{S/G2/M} = \frac{\mathbf{E}[(S_{G2/M} - \mu_{e,S/G2/M})(S_{G1/S} - \mu_{e,G1})]}{\mathbf{E}[(S_{G1/S} - \mu_{e,G1})^2]} = \frac{\sigma_{S/G2/M} \mathbf{E}[\Delta S_{G2/M} \Delta S_{G1/S}]}{\mathbf{E}[(\Delta S_{G1/S})^2]}$$

1094 where  $\mathbf{E}[\cdot]$  denotes the average (SI). So, the slope  $l_{S/G2/M}$  is computed by multiplying Eq.  
 1095 12 by  $\sigma_{S/G2/M} \Delta S_{G1/S}$ , taking averages of each side of the equation, and dividing by  
 1096  $\mathbf{E}[(\Delta S_{G1/S})^2]$ . Since G1/S size fluctuations ( $\Delta S_{G1/S}$ ) are independent of noise in the  
 1097 subsequent G2/M threshold ( $Z_{G2/M}$ ) and regulator dynamics compared with growth

1098 over S/G2/M ( $Z_{C,S/G2/M}$ ), upon taking averages, the noise terms disappear. Thus, the  
1099 linear regression slope between G1/S and G2/M sizes is

$$1100 \quad l_{S/G2/M} = \sigma_{S/G2/M}^{\Delta\lambda}.$$

1101

1102 From the definition of independently regulated phases (Eq. 11) with noise, after  
1103 rearrangement, we have

$$1104 \quad \Delta S_{G2/M} = \frac{f_{S/G2/M}}{\sigma_{S/G2/M}} \Delta S_{G1/S} + Z_{G2/M}.$$

1105 Again, the linear regression slope between G1/S and G2/M sizes is computed according  
1106 to Eq. 13, to give

$$1107 \quad l_{S/G2/M} = f_{S/G2/M}.$$

1108 Eqs. 1-8 were derived similarly but often the dependence of size fluctuations on noise  
1109 terms in preceding phases causes noise to affect size homeostasis behaviors (SI).

1110 Importantly, throughout the analytical derivations, no assumptions were made about  
1111 the distributions of  $Z_{G1/S}$ ,  $Z_{C,G1}$ ,  $Z_{G2/M}$ , and  $Z_{C,S/G2/M}$  beyond the values of their standard  
1112 deviations, indicating that, for small fluctuations in cell size, further properties of the  
1113 distributions (e.g. skewness) have no effect on size homeostasis behaviors.

1114

1115 **Conditions for the loss of size homeostasis**

1116 Derivations of the type above led to first-order expressions connecting size fluctuations  
1117 at G1/S and G2/M in consecutive cell cycles

$$1118 \quad \Delta S'_{G1/S} = \alpha \Delta S_{G1/S} + \text{noise terms}$$

$$1119 \quad \Delta S'_{G2/M} = \beta \Delta S_{G2/M} + \text{noise terms}$$

1120 where ' denotes the subsequent cell cycle, and  $\alpha$  and  $\beta$  are functions of parameters (SI).

1121 These equations establish whether fluctuations from the average cell size diverge, so  
1122 that size homeostasis is lost, even in the absence of noise according to whether  $|\alpha| \geq 1$   
1123 or  $|\beta| \geq 1$  for G1/S or G2/M, respectively (Fig. S1). The colored regions of Fig. 2A and  
1124 3A-C show where  $|\alpha| \geq 1$  or  $|\beta| \geq 1$  for the parameters specified in each plot.

1125 Simulations of single-cell trajectories with  $|\alpha| \approx 1$  and  $|\beta| \approx 1$ , i.e. close to the boundary  
1126 of size homeostasis, show that size homeostasis is compromised (Fig. 2B, 3D, S2), thus  
1127 supporting our analyses.

1128

### 1129 **General expressions for size-homeostasis statistics**

1130 The full model features up to 22 parameters (SI). This space is too large to explore  
1131 computationally. Analytical derivations effectively shrunk the parameter space, because  
1132 only certain parameter combinations affect size homeostasis statistics. Table S2 and Eqs.  
1133 1–8 exemplify specific cases where size homeostasis statistics depend on a parameter  
1134 set that is effectively strongly reduced, with fully general expressions derived in SI.

1135

1136 Regardless of the nature of cell cycle control, the linear regression slope between scaled  
1137 fluctuations in the duration of the phase and scaled size fluctuations at the beginning of  
1138 the phase is

1139 
$$\frac{1 - \lambda_g}{\sigma_{\text{phase}} - \sigma_{\text{phase}}^{\lambda_g}} (l_{\text{phase}} - \sigma_{\text{phase}}^{\lambda_g})$$

1140 where  $l_{\text{phase}}$  is the linear regression slope between cell size at the beginning vs. cell size  
1141 at the end of the phase (SI). This slope must be zero for independently regulated timer

1142 phases, thus,  $l_{\text{phase}} = f_{\text{phase}} = \sigma_{\text{phase}}^{\lambda_g}$ .



1143 **References**

- 1144 Amir, A. (2014). Cell size regulation in bacteria. *Phys Rev Lett* 112, 208102.
- 1145 Barber, F., Ho, P.Y., Murray, A.W., and Amir, A. (2017). Details matter: noise and model  
1146 structure set the relationship between cell size and cell cycle timing. *Front Cell Dev Biol*  
1147 5.
- 1148 Cadart, C. (2018). Personal communication.
- 1149 Cadart, C., Monnier, S., Grilli, J., Attia, R., Terriac, E., Baum, B., Cosentino-Lagomarsino,  
1150 M., and Piel, M. (2018). Size control in mammalian cells involves modulation of both  
1151 growth rate and cell cycle duration. *Nat Commun* 9, 3275.
- 1152 Campos, M., Surovtsev, I.V., Kato, S., Paintdakhi, A., Beltran, B., Ebmeier, S.E., and  
1153 Jacobs-Wagner, C. (2014). A constant size extension drives bacterial cell size  
1154 homeostasis. *Cell* 159, 1433-1446.
- 1155 Chandler-Brown, D., Schmoller, K.M., Winetraub, Y., and Skotheim, J.M. (2017). The  
1156 adder phenomenon emerges from independent control of pre- and post-start phases of  
1157 the budding yeast cell cycle. *Curr Biol* 27, 2774–2783.
- 1158 Coudreuse, D., and Nurse, P. (2010). Driving the cell cycle with a minimal CDK control  
1159 network. *Nature* 468, 1074-1079.
- 1160 Cross, F.R. (1988). DAF1, a mutant gene affecting size control, pheromone arrest, and  
1161 cell cycle kinetics of *Saccharomyces cerevisiae*. *Mol Cell Biol* 8, 4675–4684.

1162 Dewitte, W., Riou-Khamlichi, C., Scofield, S., Healy, J.M., Jacqumard, A., Kilby, N.J., and  
1163 Murray, J.A. (2003). Altered cell cycle distribution, hyperplasia, and inhibited  
1164 differentiation in Arabidopsis caused by the D-type cyclin CYCD3. *Plant Cell* 15, 79-92.  
1165 Di Talia, S., Skotheim, J.M., Bean, J.M., Siggia, E.D., and Cross, F.R. (2007). The effects of  
1166 molecular noise and size control on variability in the budding yeast cell cycle. *Nature*  
1167 448, 947-951.  
1168 Eun, Y.-J., Ho, P.-Y., Kim, M., LaRussa, S., Robert, L., Renner, L.D., Schmid, A., Garner,  
1169 E., and Amir, A. (2018). Archaeal cells share common size control with bacteria despite  
1170 noisier growth and division. *Nat Microbiol* 3, 148–154.  
1171 Facchetti, G., Knapp, B., Flor-Parra, I., Chang, F., and Howard, M. (2019).  
1172 Reprogramming cdr2-dependent geometry-based cell size control in fission yeast. *Curr*  
1173 *Biol* 29, 350–358.  
1174 Fantes, P.A. (1977). Control of cell size and cycle time in *Schizosaccharomyces pombe*. *J*  
1175 *Cell Sci* 24, 51-67.  
1176 Ginzberg, M.B., Chang, N., D'Souza, H., Patel, N., Kafri, R., and Kirschner, M.W. (2018).  
1177 Cell size sensing in animal cells coordinates anabolic growth rates and cell cycle  
1178 progression to maintain cell size uniformity. *ELife* 11, e26957.  
1179 Harashima, H., Dissmeyer, N., and Schnittger, A. (2013). Cell cycle control across the  
1180 eukaryotic kingdom. *Trends in Cell Biology* 23, 345-356.

- 1181 Harashima, H., and Sugimoto, K. (2016). Integration of developmental and  
1182 environmental signals into cell proliferation and differentiation through  
1183 RETINOBLASTOMA-RELATED 1. *Curr Opin Plant Biol* 29, 95–103.
- 1184 Heldt, F.S., Lunstone, R., Tyson, J.J., and Novák, B. (2018). Dilution and titration of cell-  
1185 cycle regulators may control cell size in budding yeast. *PLOS Comput Biol* 14, e1006548.
- 1186 Hilfinger, A., and Paulsson, J. (2011). Separating intrinsic from extrinsic fluctuations in  
1187 dynamic biological systems. *Proc Natl Acad Sci USA* 108, 12167–12172.
- 1188 Ho, P.-Y., and Amir, A. (2015). Simultaneous regulation of cell size and chromosome  
1189 replication in bacteria. *Front Microbiol* 6, 662.
- 1190 Hochegger, H., Takeda, S., and Hunt, T. (2008). Cyclin-dependent kinases and cell-cycle  
1191 transitions: does one fit all? *Nat Rev Mol Cell Biol* 9, 910–916.
- 1192 Jones, A.R., Forero-Vargas, M., Withers, S.P., Smith, R.S., Traas, J., Dewitte, W., and  
1193 Murray, J.A.H. (2017). Cell-size dependent progression of the cell cycle creates  
1194 homeostasis and flexibility of plant cell size. *Nat Commun* 8, 15060.
- 1195 Keifenheim, D., Sun, X., D'Souza, E., Ohira, M.J., Magner, M., Mayhew, M.B.,  
1196 Marguerat, S., and Rhind, N. (2017). Size-dependent expression of the mitotic activator  
1197 Cdc25 suggests a mechanism of size control in fission yeast. *Curr Biol* 27, 1491–1497.
- 1198 Lin, J., and Amir, A. (2018). Homeostasis of protein and mRNA concentrations in  
1199 growing cells. *Nat Commun* 9, 4496.

1200 Logsdon, M.M., Ho, P.Y., Papavinasasundaram, K., Richardson, K., Cokol, M., Sasseti,  
1201 C.M., Amir, A., and Aldridge, B.B. (2017). A parallel adder coordinates mycobacterial  
1202 cell-cycle progression and cell-size homeostasis in the context of asymmetric growth  
1203 and organization. *Curr Biol* 27, 3367–3374.

1204 Micali, G., Grilli, J., Marchi, J., Osella, M., and Cosentino Lagomarsino, M. (2018a).  
1205 Dissecting the control mechanisms for DNA replication and cell division in *E. coli*. *Cell*  
1206 *Rep* 25, 761.

1207 Micali, G., Grilli, J., Osella, M., and Lagomarsino, M.C. (2018b). Concurrent processes  
1208 set *E. coli* cell division. *Sci Adv* 4, eaau3324.

1209 Newman, J.R., Ghaemmaghami, S., Ihmels, J., Breslow, D.K., Noble, M., DeRisi, J.L., and  
1210 Weissman, J.S. (2006). Single-cell proteomic analysis of *S. cerevisiae* reveals the  
1211 architecture of biological noise. *Nature* 441, 840–846.

1212 Nordholt, N., van Heerden, J.H., and Bruggeman, F.J. (2019). Growth-rate and protein-  
1213 synthesis dynamics of single *Bacillus subtilis* cells along their cell-cycle. *bioRxiv*.

1214 Osella, M., Nugent, E., and Cosentino Lagomarsino, M. (2014). Concerted control of  
1215 *Escherichia coli* cell division. *Proc Natl Acad Sci USA* 111, 3431-3435.

1216 Padovan-Merhard, O., Nair, G.P., Biaesch, A.G., Mayer, A., Scarfone, S., Foley, S.W.,  
1217 Wu, A.R., Churchman, L.S., Singh, A., and Raj, A. (2015). Single mammalian cells  
1218 compensate for differences in cellular volume and DNA copy number through  
1219 independent global transcriptional mechanisms. *Mol Cell* 58, 339–352.

- 1220 Pan, K.Z., Saunders, T.E., Flor-Parra, I., Howard, M., and Chang, F. (2014). Cortical  
1221 regulation of cell size by a sizer *cdr2p*. *eLife* 3.
- 1222 Patterson, J.O., Rees, P., and Nurse, P. (2019). Noisy cell-size correlated expression of  
1223 Cyclin B drives probabilistic cell-size homeostasis in fission yeast. *Curr Biol* 29, 1379–  
1224 1386.
- 1225 Schmoller, K.M., and Skotheim, J.M. (2015). The biosynthetic basis of cell size control.  
1226 *Trends Cell Biol* 25, 793-802.
- 1227 Schmoller, K.M., Turner, J.J., Koivomagi, M., and Skotheim, J.M. (2015). Dilution of the  
1228 cell cycle inhibitor Whi5 controls budding-yeast cell size. *Nature* 526, 268-272.
- 1229 Scofield, S., Jones, A., and Murray, J.A.H. (2014). The plant cell cycle in context. *J Exp*  
1230 *Bot* 65, 2557–2562.
- 1231 Sekar, K., Rusconi, R., Sauls, J.T., Fuhrer, T., Noor, E., Nguyen, J., Fernandez, V.I.,  
1232 Buffing, M.F., Berney, M., Jun, S., *et al.* (2018). Synthesis and degradation of FtsZ  
1233 quantitatively predict the first cell division in starved bacteria. *Mol Syst Biol* 14, e8623.
- 1234 Shi, H., Colavin, A., Bigos, M., Tropini, C., Monds, R.D., and Huang, K.C. (2017). Deep  
1235 phenotypic mapping of bacterial cytoskeletal mutants reveals physiological robustness  
1236 to cell size. *Curr Biol* 27, 3419–3429.
- 1237 Si, F., Treut, G.L., Sauls, J.T., Vadia, S., Levin, P.A., and Jun, S. (2019). Mechanistic origin  
1238 of cell-size control and homeostasis in bacteria. *Curr Biol* 29, 1–11.

- 1239 Soifer, I., Robert, L., and Amir, A. (2016). Single-cell analysis of growth in budding yeast  
1240 and bacteria reveals a common size regulation strategy. *Curr Biol* 26, 356-361.
- 1241 Swaffer, M.P., Jones, A.W., Flynn, H.R., Snijders, A.P., and Nurse, P. (2016). CDK  
1242 substrate phosphorylation and ordering in the cell cycle. *Cell* 167, 1750–1761.
- 1243 Taheri-Araghi, S., Bradde, S., Sauls, J.T., Hill, N.S., Levin, P.A., Paulsson, J., Vergassola,  
1244 M., and Jun, S. (2015). Cell-size control and homeostasis in bacteria. *Curr Biol* 25, 385-  
1245 391.
- 1246 Turner, J.J., Ewald, J.C., and Skotheim, J.M. (2012). Cell size control in yeast. *Curr Biol*  
1247 22, 350-359.
- 1248 Varsano, G., Wang, Y., and Wu, M. (2017). Probing Mammalian Cell Size Homeostasis  
1249 by Channel-Assisted Cell Reshaping. *Cell Rep* 20, 397–410.
- 1250 Wallden, M., Fange, D., Lundius, E.G., Baltekin, Ö., and Elf, J. (2016). The  
1251 synchronization of replication and division cycles in individual *E. coli* cells. *Cell* 166,  
1252 729-739.
- 1253 Wang, P., Robert, L., Pelletier, J., Dang, W.L., Taddei, F., Wright, A., and Jun, S. (2010).  
1254 Robust growth of *Escherichia coli*. *Curr Biol* 20, 1099-1103.
- 1255 Willis, L., and Huang, K. (2017). Sizing-up the bacterial cell cycle. *Nat Rev Microbiol* 15,  
1256 606–620.

1257 Willis, L., Refahi, Y., Wightman, R., Landrein, B., Teles, J., Huang, K.C., Meyerowitz,  
1258 E.M., and Jönsson, H. (2016). Cell size and growth regulation in the *Arabidopsis thaliana*  
1259 apical stem cell niche. Proc Nat Acad Sci 113, E8238—8246.  
1260
